# Supplementary material for: Dynamic rewiring of the androgen receptor protein interaction network correlates with prostate cancer clinical outcomes
Source: Royal Society of Chemistry journal article supplement (doi:10.1039/c1ib00038a), 2011-01-01
Supplement: c1ib00038a.xlsx [file c1ib00038a.xlsx]

## Sheet: Table S1
Table S1. Putative WT-AR interacting proteins identified from MB stimulated COS-1 cells.
Gene ID	Description	Purification	Known
		(Ni or IP)	Interactor
			(Reference)
1. Components of chromatin remodeling complex
BUB3	BUB3 budding uninhibited by benzimidazoles 3 homolog	Ni/IP	-
BRD4	Bromodomain containing 4	Ni	-
C15orf55	Chromosome 15 open reading frame 55	Ni	-
SMC4	Structural maintenance of chromosomes 4	IP	-
2. Histones, histone modifiers: acetylases, deactylates, methylatranserases, demethylases
HIST1	Histone, H1	Ni/IP	-
DNMT1	DNA (cytosine-5)-methyltransferase 1	Ni	-
RBBP4	Retinoblastoma binding protein 4	Ni	-
NAP1L1	Nucleosome assembly protein 1-like 1	IP	-
NAP1L4	Nucleosome assembly protein 1-like 4	Ni	-
MECP2	Methyl CpG binding protein 2	Ni	-
3. Components of the ubiquitination/proteosome pathway
PSMD1	Proteasome 26S subunit, non-ATPase, 1	IP	-
PSMC3	Proteasome 26S subunit, ATPase, 3	IP	-
PSMD2	Proteasome 26S subunit, non-ATPase, 2	Ni	-
PSMD12	Proteasome 26S subunit, non-ATPase, 12	IP	-
PSMD13	Proteasome 26S subunit, non-ATPase, 13	IP	-
UBAP2L	Ubiquitin associated protein 2-like	Ni	-
USP7	Ubiquitin specific peptidase 7	Ni/IP	-
USP9X	Ubiquitin specific peptidase 9, X-linked	IP	-
4. Splicing and RNA metabolism
DAZAP1	DAZ associated protein 1	Ni/IP	-
HNRNPA1	hnRNPA1	Ni/IP	Yes (1)
HNRNPAB	hnRNP A/B	Ni/IP	Yes (1)
HNRNPD	hnRNP D	Ni/IP	-
HNRPDL	hnRNP D-like	Ni/IP	-
PCBP3	Poly(rC) binding protein 3	Ni/IP	-
HNRNPF	hnRNP F	IP	-
HNRNPH3	hnRNP H3	Ni/IP	-
HNRNPL	hnRNP L	IP	-
HNRNPM	hnRNP M	Ni/IP	-
HNRNPQ	hnRNP Q	Ni	-
HNRNPU	hnRNP U	Ni/IP	-
RBM3	RNA binding motif (RNP1, RRM) protein 3	Ni/IP	-
CSDE1	Cold shock domain containing E1, RNA-binding	Ni/IP	-
SERBP1	SERPINE1 mRNA binding protein 1	Ni/IP	-
DDX1	DEAD (Asp-Glu-Ala-Asp) box polypeptide 1	Ni/IP	-
DDX5	DEAD (Asp-Glu-Ala-Asp) box polypeptide 5	IP	-
DDX6	DEAD (Asp-Glu-Ala-Asp) box polypeptide 6	IP	-
DDX19B	DEAD (Asp-Glu-Ala-Asp) box polypeptide 19B	IP	-
SF1	Splicing factor 1	Ni/IP	Yes (2)
SF3A3	Splicing factor 3A, subunit 3	Ni/IP	-
SF3B1	Splicing factor 3B, subunit 1	Ni/IP	-
SFRS6	Splicing factor, arginine/serine-rich 6	Ni	-
PSIP1	PC4 and SFRS1 interacting protein 1	IP	-
ANT-1	PRP6 pre-mRNA processing factor 6	IP	Yes (1)
TRA2B	Transformer 2 homolog; splicing factor, arginine/serine-rich 10	IP	-
PRPF4	PRP4 pre-mRNA processing factor 4	IP	-
WTAP	Wilms tumor 1 associated protein	Ni	-
SNRPD1	Small nuclear ribonucleoprotein D1	Ni/IP	-
SNRPD2	Small nuclear ribonucleoprotein D2	Ni/IP	-
RPS3A	40S ribosomal protein 3a	Ni/IP	-
RPS4X	40S ribosomal protein S4; X isoform	Ni/IP	-
RPS5	40S ribosomal protein S5	Ni/IP	-
RPS6	40S ribosomal protein S6	Ni/IP	-
RPS9	40S ribosomal protein S9	IP	-
RPS10	40S ribosomal protein S10	Ni/IP	-
RPS13	40S ribosomal protein S13	Ni/IP	-
RPS17	40S ribosomal protein S17	Ni/IP	-
RPS18	40S ribosomal protein S18	Ni/IP	-
RPS19	40S ribosomal protein S19	Ni/IP	-
RPS24	40S ribosomal protein S24	IP	-
RPL3	60S ribosomal protein L3	Ni/IP	-
RPL4	60S ribosomal protein L4	Ni/IP	-
RPL6	60S ribosomal protein L6	Ni	-
RPL7	60S ribosomal protein L7	Ni/IP	-
RPL7A	60S ribosomal protein L7a	Ni/IP	-
RPL8	60S ribosomal protein L8	Ni/IP	-
RPL12	60S ribosomal protein L12	IP	-
RPL13a	60S ribosomal protein L13a	Ni	-
RPL18	60S ribosomal protein L18	Ni/IP	-
RPL30	60S ribosomal protein L30	Ni/IP	-
RPL31	60S ribosomal protein L31	Ni/IP	-
RPL35	60S ribosomal protein L35	Ni	-
RPL37a	60S ribosomal protein L37a	Ni/IP	-
RPLP1	60S ribosomal protein P1	Ni/IP	-
RAP55	RNA-associated protein 55	Ni/IP	-
EIF2A	Eukaryotic translation initiation factor 2A	Ni	-
EIF4E	Eukaryotic translation initiation factor 4E	Ni/IP	-
EIF4G1	Eukaryotic translation initiation factor 4 gamma, 1	Ni	-
EEF1A1	Eukaryotic translation elongation factor 1 alpha 1	Ni	-
EIF3H	Eukaryotic translation initiation factor 3, subunit H	Ni	-
EEF1B2	Eukaryotic translation elongation factor 1 beta	Ni/IP	-
EEF1D	Eukaryotic translation elongation factor 1 delta	Ni/IP	-
EEF1G	Eukaryotic elongation factor 1-gamma	Ni/IP	-
SNRPA	U1 small nuclear ribonulceoprotein A	Ni	-
SNRP70	U1 small nuclear ribonucleoprotein 70 kDa	Ni/IP	-
PABPC4	Poly(A) binding protein, cytoplasmic 4	IP	-
CPSF6	Cleavage and polyadenylation specific factor 6	Ni/IP	-
PRKRIP1	PRKR interacting protein 1	IP	-
RBM12	RNA binding motif protein 12	IP	-
EWSR1	Ewing sarcoma breakpoint region 1	Ni/IP	-
FXR1	Fragile X mental retardation, autosomal homolog 1	Ni/IP	-
TIA1	TIA1 cytotoxic granule-associated RNA binding protein	Ni	-
SSB	Sjogren syndrome antigen B (autoantigen La)	Ni/IP	-
DARS	aspartyl-tRNA synthetase	Ni/IP	-
FARSA	Phenylalanyl-tRNA synthetase, alpha subunit	Ni/IP	-
LARS	Leucyl-tRNA synthetase	Ni/IP	-
QARS	Glutaminyl-tRNA synthetase	Ni/IP	-
VARS	Valyl-tRNA synthetase	Ni/IP	-
XRN2	5'-3' exoribonuclease 2	IP	-
UPF1	UPF1 regulator of nonsense transcripts homolog	IP	-
METAP2	Methionyl aminopeptidase 2	IP	-
CIRBP	Cold inducible RNA binding protein	IP	-
5. DNA repair
PRKDC	protein kinase, DNA-activated, catalytic polypeptide	Ni	Yes (1)
KU70	ATP-dependent DNA helicase II, 70 kDa subunit	Ni/IP	Yes (1)
DDB1	Damage-specific DNA binding protein 1	IP	-
MCM4	Minichromosome maintenance complex component 4	IP	-
6. Chaperones and cochaperones
BAG3	BCL2-associated athanogene 3	Ni	Yes (3)
CCT3	Chaperonin containing TCP1, subunit 3	Ni/IP	-
CCT4	Chaperonin containing TCP1, subunit 4	Ni/IP	-
CCT6A	Chaperonin containing TCP1, subunit 6A	Ni	-
CCT7	Chaperonin containing TCP1, subunit 7	Ni	-
DNAJ	Dna J	Ni/IP	Yes (3)
HSPD1	Heat shock 60kDa protein 1	Ni/IP	-
HSP70	Heat shock protein 70kD	Ni/IP	Yes (3)
HSP90	Heat shock protein 90kD	Ni/IP	Yes (3)
ST13	Hsp70 interacting protein (Hsc70)	Ni	-
7. Cytoskeletal proteins
ACTA1	Actin, alpha 1	Ni/IP	Yes (1)
ACTR1A	ARP1 actin-related protein 1 homolog A, centractin alpha	IP	-
LMNB1	Lamin B1	Ni/IP	-
MYL6B	Myosin, light chain 6B	Ni	-
ACTN4	Actinin, alpha 4	Ni/IP	Yes (1)
CTTN	Cortactin	Ni/IP	-
TLN1	Talin 1	Ni/IP	-
DYNC1	dynein, cytoplasmic 1	Ni/IP	-
FLNA	Filamin A	Ni/IP	Yes (3)
PARVA	Parvin, alpha	IP	-
MACF1	Microtubule-actin crosslinking factor 1	Ni	-
SPTAN1	Spectrin, alpha, non-erythrocytic 1	Ni/IP	-
SEP9	Septin 9	IP	-
TUB	Tubulin	Ni/IP	-
TJP1	Tight-junction protein 1	Ni/IP	-
VIM	Vimentin	Ni/IP	-
RDX	Radixin	IP	-
WIPF2	WAS/WASL interacting protein family, member 2	Ni	-
MSN	Moesin	IP	-
8. Protein involved in endocytosis
CLTA	Clathrin, light chain	Ni	-
9. Proteins involved in signal transduction pathway, scaffolds and adaptors
HINT1	Histidine triad nucleotide binding protein 1	IP	-
DNM2	Dynamin 2	IP	-
EPS8	Epidermal growth factor receptor pathway substrate 8	IP	-
PIP4K2C	Phosphatidylinositol-5-phosphate 4-kinase, type II, gamma	IP	-
HIPA	Huntingtin-interacting protein A	IP	Yes (3)
PLCE1	Phospholipase C, epsilon 1	IP	-
CSNK2A1	Casein kinase 2, alpha 1	IP	-
FKBP3	FK506 binding protein 3	IP	-
DLG5	Discs, large homolog 5	Ni	-
NPM1	Nucleophosmin	Ni/IP	Yes (4)
TBL1XR1	Transducin (beta)-like 1 X-linked receptor 1	Ni	-
CIT	Citron (rho-interacting, serine/threonine kinase 21)	Ni	-
IRF3	Interferon regulatory factor 3	Ni/IP	-
PDAP1	PDGFA associated protein 1	Ni	-
STRAP	Serine/threonine kinase receptor associated protein	Ni/IP	-
SKP1	S-phase kinase-associated protein 1	Ni	-
G3BP1	Ras-GTPase-activating protein-binding protein 1	Ni/IP	-
SAM68	GAP-associated tyrosine phosphoprotein p62	Ni	-
NOLC1	Nucleolar and coiled-body phosphoprotein 1	Ni/IP	-
10. Cell cycle regulators
DIS3	DIS3 mitotic control homolog	IP	-
PELO	Pelota homolog	IP	-
MCM5	Minichromosome maintenance complex component 5	Ni/IP	-
MCM6	Minichromosome maintenance complex component 6	Ni/IP	-
PA2G4	Proliferation-associated 2G4	Ni/IP	Yes (5)
CAPRIN1	cell cycle associated protein 1	Ni/IP	-
SEP7	Septin 7	Ni/IP	-
11. Regulators of apoptosis
PRDX1	Peroxiredoxin 1	Ni/IP	Yes (6)
12. Transcriptional regulators
TAF15	RNA polymerase II, TATA box binding protein (TBP)-associated factor	IP	-
STAT1	Signal transducer and activator of transcription 1	IP	-
THOC4	THO complex 4	IP	-
BTF3	Basic transcription factor 3	IP	-
TBPL1	TBP-like 1	IP	Yes (3)
FHL1	Four and a half LIM domains 1	IP	Yes (3)
HTANoF1	HIV-1 Tat specific factor 1	Ni/IP	Yes (3)
MYCBP	c-myc binding protein	Ni	-
NONO	Non-POU domain containing, octamer-binding	Ni/IP	Yes (3)
TRIM25	tripartite motif-containing 25	IP	-
TRIM28	Tripartite motif-containing 28	Ni/IP	-
FUBP1	Far upstream element (FUSE) binding protein 1	Ni/IP	-
YBX1	Y box binding protein 1	Ni/IP	Yes (3)
PNRC1	proline-rich nuclear receptor coactivator 1	Ni	Yes (1)
ILF3	Interleukin enhancer binding factor 3	IP	-
13. Kinases and phosphatases
PKLR	Pyruvate kinase, liver and RBC	Ni	-
STK24	Serine/threonine kinase 24	IP	-
14. Protein transport
XPO1	Exportin 1, CRM1 homolog	IP	-
IMB1	Importin beta-1 subunit	Ni/IP	-
SEC23A	Protein transport protein Sec23	Ni/IP	-
15. Other diverse functions
NCL	Nucleolin	IP	-
PACSIN3	Protein kinase C and casein kinase substrate in neurons 3	IP	-
MAT2A	Methionine adenosyltransferase II, alpha	IP	-
WDR1	WD repeat domain 1	IP	-
GCN1L1	GCN1 general control of amino-acid synthesis 1-like 1	IP	-
ZC3H15	Zinc finger CCCH-type containing 15	IP	-
SDCCAG1	Serologically defined colon cancer antigen 1	IP	-
TPR	Translocated promoter region	Ni	-
TPD52	Tumor protein D52	Ni/IP	-
RRM1	Ribonucleotide reductase M1	Ni/IP	-
ATXN2L	Ataxin 2-like	Ni	-
HSPA9	heat shock 70kDa protein 9 (mortalin)	Ni/IP	-
SERPINH1	Serpin peptidase inhibitor, clade H (heat shock protein 47), member 1	Ni/IP	-
MDH2	malate dehydrogenase 2, NAD	IP	-
DBN1	Drebrin 1	Ni	-
AASDHPPT	Aminoadipate-semialdehyde dehydrogenase- phosphopantetheinyl transferase	Ni/IP	-
IMPDH2	IMP (inosine monophosphate) dehydrogenase 2	Ni	-
MTHFD1	Methylenetetrahydrofolate dehydrogenase (NADP+ dependent) 1	Ni/IP	-
PHGDH	Phosphoglycerate dehydrogenase	Ni/IP	-
SRP72	Signal recognition particle 72 kD protein	Ni/IP	-
TARDBP	TAR DNA binding protein	Ni	-
RFC2	replication factor C (activator 1) 2	Ni	-
HDLBP	High density lipoprotein binding protein	Ni/IP	-
ACOT7	Acyl-CoA thioesterase 7	IP	-
1	Heemers HV, Tindall DJ. Androgen receptor (AR) coregulators: a diversity of functions converging on and regulating the AR transcriptional complex. Endocr Rev 28: 778-808, 2007.
2	Zhou D, Quach KM, Yang C, Lee SY, Pohajdak B, Chen S. PNRC: a proline-rich nuclear receptor coregulatory protein that modulates transcriptional activation of multiple nuclear receptors including orphan receptors SF1 (steroidogenic factor 1) and ERRalpha1 (estrogen related receptor alpha-1). Mol Endocrinol 14: 986-998, 2000.
3	Gottlieb B, Beitel LK, Wu JH, Trifiro M. The androgen receptor gene mutations database (ARDB): 2004 update. Hum Mutat 23: 527-533, 2004.
4	Leotoing L, Meunier L, Manin M, Mauduit C, Decaussin M, Verrijdt G, Claessens F, Benahmed M, Veyssiere G, Morel L, Beaudoin C. Influence of nucleophosmin/B23 on DNA binding and transcriptional activity of the androgen receptor in prostate cancer cell. Oncogene 27: 2858-2867, 2008.
5	Zhang Y, Akinmade D, Hamburger AW. The ErbB3 binding protein Ebp1 interacts with Sin3A to repress E2F1 and AR-mediated transcription. Nucleic Acids Res 33: 6024-6033, 2005.
6	Park SY, Yu X, Ip C, Mohler JL, Bogner PN, Park YM. Peroxiredoxin 1 interacts with androgen receptor and enhances its transactivation. Cancer Res 67: 9294-9303, 2007.

## Sheet: Table S2
Table S2. Putative WT-AR interacting proteins identified from unstimulated cells
Gene ID	Description	Purification	Known
		(Ni or IP)	Interactor
			(Reference)
1. Components of chromatin remodeling complex
TOP1	Topoisomerase (DNA) I	Ni/IP	-
MCM2	Minichromosome maintenance complex component 2	Ni/IP	-
SMCHD1	Structural maintenance of chromosomes flexible hinge domain containing 1	Ni/IP	-
SPC24	spindle pole body component 24 homolog	Ni	-
SMC3	Structural maintenance of chromosomes 3	Ni	-
NCAPD2	non-SMC condensin I complex, subunit D2	Ni	-
2. Histones, histone modifiers: acetylases, deactylates, methylatranserases, demethylases
H2B	Histone cluster 2, H2be	Ni	-
DNMT1	DNA (cytosine-5)-methyltransferase 1	Ni	-
3. Components of the ubiquitination/proteosome pathway
CUL1		Ni	-
NOB1	NIN1/RPN12 binding protein 1 homolog	Ni	-
ASB6	Ankyrin repeat and SOCS box-containing 6	Ni	-
ECM29	ECM29 homolog, proteasome accessory protein	Ni/IP	-
PSMB3	proteasome subunit, beta type, 3	Ni	-
PSMD1	Proteasome 26S subunit, non-ATPase, 1	Ni	-
PSMD3	Proteasome 26S subunit, non-ATPase, 3	Ni	-
PSMC4	Proteasome 26S subunit, ATPase, 4	Ni/IP	-
PSMC6	Proteasome 26S subunit, ATPase, 6	Ni	-
PSMD7	proteasome 26S subunit, non-ATPase, 7	Ni	-
PSMG1	Proteasome (prosome, macropain) assembly chaperone 1	IP	-
USP7	Ubiquitin specific peptidase 7	Ni/IP	-
HSPB1	Heat shock protein 27	Ni/IP	Yes (1)
UBAP2L	Ubiquitin associated protein 2-like	Ni	-
USP9X	Ubiquitin specific peptidase 9, X-linked	Ni	-
HUWE1	E3 Ubiquitin-protein ligase, isoform 2	Ni	-
4. Splicing and RNA metabolism
HNRNPA1	hnRNP A1	Ni/IP	Yes (2)
HNRNPAB	hnRNP A/B	Ni/IP	Yes (2)
HNRNPA2/B1	hnRNP A2/B1	Ni
HNRNPC	hnRNP C	Ni	-
HNRNPD	hnRNP D	NI/IP	-
HNRPDL	hnRNP D-like	Ni/IP	-
HNRNPF	hnRNP F	Ni/IP	-
HNRNPI	hnRNP I	Ni/IP	-
HNRNPK	hnRNP K	Ni/IP
HNRNPL	hnRNP L	Ni	-
HNRNPM	hnRNP M	Ni/IP	-
HNRNPQ	hnRNP Q	Ni/IP	-
HNRNPU	hnRNP U	Ni/IP	-
FUS	fusion (involved in t(12;16) in malignant liposarcoma	Ni/IP	-
SNRPB	Small nuclear ribonucleoprotein polypeptides B and B1	Ni	-
SNRPD1	Small nuclear ribonucleoprotein D1	Ni/IP	-
SF1	Splicing factor 1	Ni/IP	Yes (3)
SFRS3	Splicing factor, arginine/serine-rich 3	Ni/IP	-
KHSRP	KH-type splicing regulatory protein	IP	-
TRA2B	Transformer 2 homolog; splicing factor, arginine/serine-rich 10	Ni/IP	-
SFRS12	Splicing factor, arginine/serine-rich 12	Ni	-
SF3B2	Splicing factor 3B, subunit 2	Ni/IP	-
SF3B3	Splicing factor 3B, subunit 3	Ni/IP	-
RNPS1	RNA binding protein S1, serine-rich domain	Ni	-
RPSA	40S ribosomal protein SA	IP	-
RPS2	40S ribosomal protein S2	Ni	-
RPS3A	40S ribosomal protein 3a	Ni/IP	-
RPS5	40S ribosomal protein S5	Ni/IP	-
RPS7	40S ribosomal protein S7	IP	-
RPS8	40S ribosomal protein S8	Ni/IP	-
RPS10	40S ribosomal protein S10	IP	-
RPS13	40S ribosomal protein 13	Ni/IP	-
RPS15	40S ribosomal protein 15	Ni/IP	-
RPS18	40S ribosomal protein S18	Ni	-
RPS19	40S ribosomal protein S19	Ni	-
RPS21	40S ribosomal protein S21	N/IP	-
RPS24	40S ribosomal protein S24	Ni	-
RPS28	40S ribosomal protein S28	Ni	-
RPS29	40S ribosomal protein S29	Ni/IP	-
RPL6	60S ribosomal protein L6	Ni/IP	-
RPL7A	60S ribosomal protein L7a	Ni/IP	-
RPL8	60S ribosomal protein L8	Ni	-
RPL9	60S ribosomal protein L9	Ni/IP	-
RPL10	60S ribosomal protein L10	Ni	-
RPL12	60S ribosomal protein L12	Ni/IP	-
RPL17	60S ribosomal protein L17	Ni	-
RPL18	60S ribosomal protein L18	Ni/IP	-
RPL21	60S ribosomal protein L21	Ni	-
RPL22	60S ribosomal protein L22	Ni	-
RPL26	60S ribosomal protein L26	Ni	-
RPL27	60S ribosomal protein L27	Ni	-
RPL30	60S ribosomal protein L30	Ni	-
RPL31	60S ribosomal protein L31	Ni	-
RPL37	60S ribosomal protein L37	Ni	-
RPL37a	60S ribosomal protein L37a	Ni/IP	-
RPLP0	60S ribosomal protein P0	Ni/IP	-
RPLP2	60S ribosomal protein P2	Ni/IP	-
EFTUD2	Elongation factor Tu GTP binding domain containing 2	Ni/IP	-
AGFG1	ArfGAP with FG repeats 1
PSF	splicing factor proline/glutamine-rich (polypyrimidine tract binding protein associated)	Ni	Yes (1)
C1QBP	complement component 1, q subcomponent binding protein	Ni	-
SNRPD3	Small nuclear ribonucleoprotein D3 polypeptide	Ni	-
SNRP70	Small nuclear ribonucleoprotein 70kDa polypeptide	Ni/IP	-
SERBP1	SERPINE1 mRNA binding protein 1	Ni/IP	-
DDX1	DEAD (Asp-Glu-Ala-Asp) box polypeptide 1	Ni/IP	-
DHX16	DEAH (Asp-Glu-Ala-His) box polypeptide 16	Ni	-
DDX23	DEAD (Asp-Glu-Ala-Asp) box polypeptide 23	Ni	-
DDX29	DEAH (Asp-Glu-Ala-His) box polypeptide 29	Ni	-
DHX38	DEAH (Asp-Glu-Ala-His) box polypeptide 38	IP	-
DDX3Y	DEAD (Asp-Glu-Ala-Asp) box polypeptide 3, Y-linked	Ni/IP	-
CPSF5	Cleavage and polyadenylation specific factor 6	Ni	-
EIF2A	Eukaryotic translation initiation factor 2A	Ni	-
EIF3A	Eukaryotic translation initiation factor 3, subunit A	Ni/IP	-
EIF4A2	Eukaryotic translation initiation factor 4A, isoform 2	Ni	-
EIF4G1	Eukaryotic translation initiation factor 4 gamma, 1	Ni/IP	-
EIF5A	Eukaryotic translation initiation factor 5A	Ni/IP	-
EEF1A1	Eukaryotic translation elongation factor 1 alpha, 1	IP	-
EEF1B2	Eukaryotic translation elongation factor 1 beta	Ni/IP	-
EEF1D	Eukaryotic translation elongation factor 1 delta	Ni/IP	-
EEF1E1	Eukaryotic translation elongation factor epsilon, 1	Ni	-
PABPC1L	Poly(A) binding protein, cytoplasmic 1-like	Ni	-
PABPC4	poly(A) binding protein, cytoplasmic 4	Ni	-
LARP1	La ribonucleoprotein domain family member, 1	Ni	-
XRN2	5'-3' exoribonuclease 2	IP	-
ABCF1	ATP-binding cassette, subfamily F (GCN20), member 1	IP	-
DARS	Aspartyl-tRNA synthetase	Ni/IP	-
NARS	Asparaginyl-tRNA synthetase	Ni/IP	-
EPRS	Glutamyl-prolyl-tRNA synthetase	Ni/IP	-
IARS	Isoleucyl-tRNA synthetase	IP	-
RARS	Arginyl-tRNA synthetase	Ni/IP	-
CIRBP	Cold inducible RNA binding protein	Ni/IP	-
5. DNA repair
APEX1	APEX nuclease (multifunctional DNA repair enzyme) 1	Ni/IP	-
KU70	ATP-dependent DNA helicase II, 70 kDa subunit	IP	Yes (1)
KU80	X-ray repair complementing defective repair in Chinese hamster cells 5	Ni/IP	Yes (1)
PARP1	poly (ADP-ribose) polymerase 1	Ni/IP	-
RAD50	RAD50 homolog	Ni	-
6. Chaperones and cochaperones
BAG3
TCP1	T-complex 1	Ni/IP	-
CCT2	Cchaperonin containing TCP1, subunit 2	Ni/IP	-
CCT3	Chaperonin containing TCP1, subunit 3	Ni/IP	-
CCT4	Chaperonin containing TCP1, subunit 4	Ni/IP	-
CCT6A	Chaperonin containing TCP1, subunit 6A	Ni	-
CCT8	chaperonin containing TCP1, subunit 8	Ni/IP	-
DNAJ	DnaJ	Ni	Yes (4)
HSPA8	Heat shock protein 70kD protein 8	Ni/IP	Yes (4)
HSP60	Heat shock protein 60	Ni/IP	-
HSC71	Heat shock cognate protein, 71kD	Ni/IP	-
HSP90	Heat shock protein 90kD	Ni/IP	Yes (4)
7. Cytoskeletal proteins
NUDCD3	NudC domain containing 3	IP	-
EZR	Ezrin	IP	Yes (1)
CNN2	Calponin 2	Ni	-
TLN1	Talin 1	Ni/IP	-
MYL6B	Myosin, light chain 6B	Ni	-
ACTA1	Actin, alpha 1	Ni/IP	Yes (1)
MAP4	Microtubule-associated protein 4	Ni	-
DYNLT1	Dynein, light chain, Tctex-type 1	Ni	-
COPA	Coatomer protein complex, subunit alpha	Ni	-
ACTN4	Actinin, alpha 4	Ni/IP	Yes (1)
MYO15A	Myosin XVA	Ni/IP	-
LMNA	Lamin A/C	Ni/IP	-
FLNB	Filamin B	Ni	Yes (4)
FLNC	Filamin C	Ni/IP	Yes (1)
TUB	Tubulin	Ni/IP	-
SPTAN1	Spectrin, alpha, non-erythrocytic 1	Ni/IP	-
SEP9	Septin 9	Ni	-
TJP1	Tight-junction protein 1	Ni/IP	-
CLASP2	Cytoplasmic linker associated protein 2	Ni	-
DCTN2	Dynactin 2 (p50)	Ni	-
CORO1C	Coronin, actin binding protein, 1C	Ni/IP	-
MSN	Moesin	IP	-
8. Protein involved in endocytosis
HOOK3	Hook homolog 3	Ni	-
EHD2	EH-domain containing 2	Ni	-
9. Proteins involved in signal transduction pathway
NMT2	N-myristoyltransferase 2	Ni/IP	-
CSNK2A1	Casein kinase 2, alpha 1	Ni/IP	-
G3BP1	Ras-GTPase-activating protein-binding protein 1	Ni/IP	-
HINT1	Histidine triad nucleotide binding protein 1	Ni/IP	-
CTNNA1	catenin (cadherin-associated protein), alpha 1	Ni/IP	Yes (1)
CTNNA2	catenin (cadherin-associated protein), alpha 2	Ni/IP	Yes (1)
SEP6	Septin 6	Ni	-
RANBP6	RAN binding protein 6	Ni/IP	Yes (1)
MAPK1	Mitogen-activated protein kinase 1	Ni	-
MAPK3	Mitogen-activated protein kinase 3	Ni	-
DNM1L	Dynamin 1-like	Ni	-
10. Cell cycle regulators
SEP2	Septin 2	Ni/IP	-
SEP7	Septin 7	Ni/IP	-
PA2G4	Proliferation-association 2G4	Ni/IP	-
CDC5L	CDC5 cell division cycle 5-like	Ni/IP	-
CDK3	Cyclin-dependent kinase 3	Ni	-
CCAR1	Cell division cycle and apoptosis regulator 1	Ni	-
CAPRIN1	Cell cycle associated protein 1	Ni/IP	-
11. Regulators of apoptosis
ATG5	ATG5 autophagy related 5 homolog	Ni	-
AVEN	Apoptosis, caspase activation inhibitor	Ni	-
12. Transcriptional regulation
WDR61	WD repeat domain 61	Ni	-
NRBP1	Nuclear receptor binding protein 1	Ni	-
TBPL1	TBP-like 1	Ni	Yes (4)
IK	IK cytokine, down-regulator of HLA II	Ni	-
ILF3	Interleukin enhancer binding factor 3	Ni	-
DBC1	Deleted in breast cancer 1	Ni	-
STAT1	Signal transducer and activator of transcription 1	Ni	-
CHD4	Chromodomain helicase DNA binding protein 4	Ni/IP	-
RUVBL1	RuvB-like 1	Ni	-
TF2E1	general transcription factor IIE	Ni	-
TARDBP	TAR DNA binding protein	Ni	-
TRIM25	tripartite motif-containing 25	Ni	-
TRIM28	Tripartite motif-containing 28	IP	-
SUPT16H	Suppressor of Ty 16 homolog	IP	-
13. Kinases and phosphatases
PKM2	Pyruvate kinase, muscle	Ni/IP	-
SRPK1	SFRS protein kinase 1	Ni	-
PPP2CA	Protein phosphatase 2	Ni	-
EIF2AK2	Eukaryotic translation initiation factor 2-alpha kinase 2	IP	-
DGKA	Diacylglycerol kinase, alpha	IP	-
14. Protein transport
NPLOC4	Nuclear protein localization 4 homolog	Ni/IP	-
ABCE1	ATP-binding cassette, sub-family E (OABP), member 1	Ni/IP	-
SEC23A	Protein transport protein Sec23A	Ni/IP	-
SEC23B	Sec23 homolog B	Ni/IP	-
IPOA3	Importin alpha 3	Ni	-
IPO4	Importin 4	Ni	-
HRB	HIV-1 Rev binding protein	Ni/IP	-
15. Other diverse functions
CTSD	Cathepsin D	Ni	-
PRR4	Proline rich 4 (lacrimal)	Ni	-
FASN	Fatty acid synthase	Ni/IP	-
POTEF	Similar to protein expressed in prostate, ovary, testis, and placenta 2	Ni/IP	-
NCL	Nucleolin	Ni/IP	-
RRM1	Ribonucleotide reductase M1	Ni	-
MDH2	Malate dehydrogenase 2, NAD (mitochondrial)	Ni/IP	-
SDCCAG1	Serologically defined colon cancer antigen 1	Ni	-
WDR1	WD repeat domain 1	Ni/IP	-
CYFIP1	Cytoplasmic FMR1 interacting protein 1	Ni	-
GMPS	Guanine monphosphate synthetase	Ni	-
SERPINH1	Serpin peptidase inhibitor, clade H (heat shock protein 47), member 1	Ni	-
MTHFD1	Methylenetetrahydrofolate dehydrogenase (NADP+ dependent) 1	Ni	-
IMPDH1	IMP (inosine monophosphate) dehydrogenase 1	Ni	-
GAPDH	Glyceraldehyde-3-phosphate dehydrogenase	Ni	-
RFC2	Replication factor C (activator 1) 2	Ni	-
RFC5	Replication factor C (activator 1) 5	Ni	-
LACRT	Lacritin	Ni	-
GLS	Glutaminase	Ni	-
HSPC111	Hypothetical protein HSPC111	IP	-
C9orf86	Chromosome 9 open reading frame 86	IP	-
1	Zoubeidi A, Zardan A, Beraldi E, Fazli L, Sowery R, Rennie P, Nelson C, Gleave M. Cooperative interactions between androgen receptor (AR) and heat-shock protein 27 facilitate AR transcriptional activity. Cancer Res 67: 10455-10465, 2007.
2	Heemers HV, Tindall DJ. Androgen receptor (AR) coregulators: a diversity of functions converging on and regulating the AR transcriptional complex. Endocr Rev 28: 778-808, 2007.
3	Zhou D, Quach KM, Yang C, Lee SY, Pohajdak B, Chen S. PNRC: a proline-rich nuclear receptor coregulatory protein that modulates transcriptional activation of multiple nuclear receptors including orphan receptors SF1 (steroidogenic factor 1) and ERRalpha1 (estrogen related receptor alpha-1). Mol Endocrinol 14: 986-998, 2000.
4	Gottlieb B, Beitel LK, Wu JH, Trifiro M. The androgen receptor gene mutations database (ARDB): 2004 update. Hum Mutat 23: 527-533, 2004.

## Sheet: Table S3
Table S3. Putative T877A-AR interacting proteins identified from MB stimulated cells
Gene ID	Description	Present in wtAR	Present in AR T877A
		+MB	unstimulated
1. Components of chromatin remodeling complex
CEP170	centrosomal protein 170kDa	-	-
BUB3	BUB3 budding uninhibited by benzimidazoles 3 homolog	+	-
NAP1L1	nucleosome assembly protein 1-like 1	+	-
2. Histones, histone modifiers: acetylases, deactylates, methylatranserases, demethylases
HIST1	Histone, H1	+	-
HIST1H1C	histone cluster 1, H1c	-	-
HIST1H1E	histone cluster 1, H1e	-	-
H1F0	H1 histone family, member 0	-	-
HIST2H2BE	histone cluster 2, H2be	-	-
HIST1H2BL	histone cluster 1, H2bl	-	+
DNMT1	DNA (cytosine-5)-methyltransferase 1	+	+
3. Components of the ubiquitination/proteosome pathway
ECM29	ECM29 homolog, proteasome accessory protein	+	+
TPP2	tripeptidyl peptidase II	-	-
CUL1	Cullin 1	+	+
CUL3	Cullin 3	-	-
PCNP	PEST proteolytic signal containing nuclear protein	-	+
PSMD1	Proteasome 26S subunit, non-ATPase, 1	+	+
PSMG4	proteasome (prosome, macropain) assembly chaperone 4	-	-
UBAP2	Ubiquitin associated protein 2	-	-
USP39	Ubiquitin specific peptidase 39	-	-
USP7	Ubiquitin specific peptidase 7	+	+
USP8	Ubiquitin specific peptidase 8	-	-
USP9X	Ubiquitin specific peptidase 9, X-linked	+	-
USP9Y	Ubiquitin specific peptidase 9, Y-linked	-	-
4. Splicing and RNA metabolism
EMG1	EMG1 Nucleolar protein homologue	-	-
PRMT3	protein arginine methyltransferase 3	-	-
LUC7L	LUC7 like	+	-
LUC7L2	LUC7 like-2	+	-
SRP14	signal recognition particle 14kDa (homologous Alu RNA binding protein)	-	+
DAZAP1	DAZ associated protein 1	+	-
KHSRP	KH-type splicing regulatory protein	+	+
SRRM2	serine/arginine repetitive matrix 2	-	+
HNRNPA0	hnRNPA0	+	-
HNRNPA1	hnRNPA1	+	+
HNRNPA2B1	hnRNP A2/B1	-	+
HNRNPA3	hnRNPA3	-	-
HNRNPAB	hnRNP A/B	+	+
HNRNPD	hnRNP D	+	+
HNRPDL	hnRNP D-like	+	+
PCBP1	Poly(rC) binding protein 1	-	+
PCBP2	poly(rC) binding protein 2	-	-
HNRNPF	hnRNP F	+	+
HNRNPH1	hnRNP H1	-	+
HNRNPH2	hnRNP H2	+	-
HNRNPH3	hnRNP H3	+	-
HNRNPI	hnRNP I (polypyrimidine tract binding protein 1)	-	+
HNRNPK	hnRNP K	-	+
HNRNPL	hnRNP L	+	+
HNRNPM	hnRNP M	+	+
HNRNPQ	hnRNP Q	+	+
FUS	fusion (involved in t(12;16) in malignant liposarcoma)	-	+
RBM3	RNA binding motif (RNP1, RRM) protein 3	+	-
ZCCHC8	zinc finger, CCHC domain containing 8	-	-
SRP9	signal recognition particle 9kDa	-	+
CSDE1	Cold shock domain containing E1, RNA-binding	+	-
SERBP1	SERPINE1 mRNA binding protein 1	+	+
DDX1	DEAD (Asp-Glu-Ala-Asp) box polypeptide 1	+	+
DDX5	DEAD (Asp-Glu-Ala-Asp) box polypeptide 5	+	-
DDX6	DEAD (Asp-Glu-Ala-Asp) box polypeptide 6	+	-
DDX21	DEAD (Asp-Glu-Ala-Asp) box polypeptide 21)	-	+
DHX29	DEAH (Asp-Glu-Ala-His) box polypeptide 29	+	-
SF1	Splicing factor 1	+	+
SF3A2	Splicing factor 3A, subunit 2	+	-
SF3A3	Splicing factor 3A, subunit 3	+	-
SF3B1	Splicing factor 3B, subunit 1	+	-
SF3B2	Splicing factor 3B, subunit 2	+	+
SFRS3	splicing factor, arginine/serine-rich 3	-	+
SFRS12	splicing factor, arginine/serine-rich 12	-	+
TRA2B	Transformer 2 homolog; splicing factor, arginine/serine-rich 10	+	+
PRPF19	PRP19/PSO4 pre-mRNA processing factor 19	+	-
PRPF40A	PRP40 pre-mRNA processing factor 4, homolog A	+	-
SNRPD1	Small nuclear ribonucleoprotein D1	+	+
SNRPD2	Small nuclear ribonucleoprotein D2	+	-
SNRPD3	Small nuclear ribonucleoprotein D3	-	+
SNRPE	Small nuclear ribonucleoprotein E	+	-
RSL1D1	ribosomal L1 domain containing 1	-	+
RPS3A	40S ribosomal protein 3a	+	+
RPS4X	40S ribosomal protein S4; X isoform	+	-
RPS5	40S ribosomal protein S5	+	+
RPS6	40S ribosomal protein S6	+	+
RPS9	40S ribosomal protein S9	+	-
RPS10	40S ribosomal protein S10	+	-
RPS12	40S ribosomal protein S12	-	+
RPS13	40S ribosomal protein S13	+	-
RPS14	40S ribosomal protein S14	-	+
RPS17	40S ribosomal protein S17	+	-
RPS18	40S ribosomal protein S18	+	-
RPS19	40S ribosomal protein S19	+	-
RPS20	40S ribosomal protein S20	-	+
RPS24	40S ribosomal protein S24	+	+
RPS25	40S ribosomal protein S25	-	-
RPS26	40S ribosomal protein S26	-	-
RPS28	40S ribosomal protein S28	-	+
RPS29	40S ribosomal protein S29	-	+
RPL3	60S ribosomal protein L3	+	+
RPL4	60S ribosomal protein L4	+	-
RPL6	60S ribosomal protein L6	+	+
RPL7	60S ribosomal protein L7	+	+
RPL7A	60S ribosomal protein L7a	+	+
RPL8	60S ribosomal protein L8	+	+
RPL10	60S ribosomal protein L10	-	-
RPL12	60S ribosomal protein L12	+	+
RPL13	60S ribosomal protein L13	+	-
RPL17	60S ribosomal protein L17	+	+
RPL18	60S ribosomal protein L18	+	+
RPL18A	60S ribosomal protein L18a	-	-
RPL21	60s ribosomal protein L21	+	+
RPL22	60S ribosomal protein L22	-	+
RPL23A	60S ribosomal protein L23a	-	+
RPL26	60S ribosomal protein L26	-	-
RPL27A	60S ribosomal protein L27a	-	+
RPL31	60S ribosomal protein L31	+	+
RPL34	60S ribosomal protein L34	-	+
RPL36	60S ribosomal protein L36	-	+
RPL36A	60S ribosomal protein L36a	-	-
RPL37	60S ribosomal protein L37	-	-
RPL37a	60S ribosomal protein L37a	+	+
RPLP1	60S ribosomal protein P1	+	-
EIF1AY	eukaryotic translation initiation factor 1A, Y-linked	-	+
EEF1A2	eukaryotic translation elongation factor 1 alpha 2	+	-
EIF2A	Eukaryotic translation initiation factor 2A	+	+
EIF4A1	Eukaryotic translation initiation factor 4A, 1	+	-
EIF4A2	Eukaryotic translation initiation factor 4A, 2	-	-
EIF4G3	Eukaryotic translation initiation factor 4 gamma, 3	+	+
EIF5A	Eukaryotic translation initiation factor 5A	+	+
EEF1A1	Eukaryotic translation elongation factor 1 alpha 1	+	+
EEF1B2	eukaryotic translation elongation factor 1 beta 2	+	+
EEF1D	Eukaryotic translation elongation factor 1 delta	+	+
EEF1G	Eukaryotic elongation factor 1-gamma	+	-
EFTUD2	elongation factor Tu GTP binding domain containing 2	-	+
SNRPA	U1 small nuclear ribonulceoprotein A	+	-
SNRPB	small nuclear ribonucleoprotein polypeptides B and B1	-	-
C19orf43	Chromosome 19 open reading frame 43	-	-
SNRP70	U1 small nuclear ribonucleoprotein 70 kDa	+	+
SNRNP200	small nuclear ribonucleoprotein 200kDa (U5)	+	+
U2AF2	U2 small nuclear RNA auxiliary factor 2	+	-
PABPC1	Poly(A) binding protein, cytoplasmic 1	+	-
PABPC4	Poly(A) binding protein, cytoplasmic 4	+	+
FXR1	Fragile X mental retardation, autosomal homolog 1	+	+
FARSA	Phenylalanyl-tRNA synthetase, alpha subunit	+	-
KARS	lysyl-tRNA synthetase	+	-
LARS	Leucyl-tRNA synthetase	+	-
QARS	Glutaminyl-tRNA synthetase	+	-
CIRBP	Cold inducible RNA binding protein	+	+
5. DNA repair
KU70	ATP-dependent DNA helicase II, 70 kDa subunit	+	+
KU80	ATP-dependent DNA helicase II, 80 kDa subunit	-	+
MCM4	Minichromosome maintenance complex component 4	+	-
6. Chaperones and cochaperones
BAG3	BCL2-associated athanogene 3	+	+
CSP	Cold shock protein	-	-
CCT3	Chaperonin containing TCP1, subunit 3	+	+
CCT6A	Chaperonin containing TCP1, subunit 6A	+	-
DNAJ	Dna J	+	-
HSPD1	Heat shock 60kDa protein 1	+	-
HSP70	Heat shock protein 70kD	+	-
HSP90	Heat shock protein 90kD	+	+
7. Cytoskeletal proteins
ACTA1	Actin, alpha 1	+	-
ACTA2	actin, alpha 2, smooth muscle, aorta	-	+
ACTG1	Actin, gamma 1	-	-
ACTR1A	ARP1 actin-related protein 1 homolog A, centractin alpha	+	-
MITD1	MIT, microtubule interacting and transport, domain containing 1	-	+
MAPRE2	microtubule-associated protein, RP/EB family, member 2	-	-
LMNB2	Lamin B2	-	-
MYL6B	Myosin, light chain 6B	+	-
CORO1C	Coronin, actin binding protein, 1C	-	+
SHROOM3	shroom family member 3	-	+
ACTN2	Actinin, alpha 2	-	-
ACTN3	Actinin, alpha 3	-	+
ACTN4	Actinin, alpha 4	+	+
CNN2	calponin 2	-	-
EZR	Ezrin	-	-
TPM1	tropomyosin 1 (alpha)	-	-
KLRAQ1	KLRAQ motif containing 1	-	-
MPRIP	myosin phosphatase Rho interacting protein	-	-
DYNC1LI1	dynein, cytoplasmic 1, light intermediate chain 1	-	-
DYNC1	dynein, cytoplasmic 1	+	-
FLNC	Filamin C	-	+
MACF1	Microtubule-actin crosslinking factor 1	+	-
SPTAN1	Spectrin, alpha, non-erythrocytic 1	+	+
TUB	Tubulin	+	+
TJP1	Tight-junction protein 1	+	+
MSN	Moesin	+	-
9. Proteins involved in signal transduction pathway, scaffolds and adaptors
TRIP6	Thyroid receptor-interacting protein 6	-	+
ITCH	Itchy homolog E3 ubiquitin protein ligase	-	-
OSTF1	Osteoclast stimulating factor 1	-	-
TTLL12	tubulin tyrosine ligase-like family, member 12	-	-
CSNK1A1L	casein kinase 1, alpha 1-like	-	+
HINT1	Histidine triad nucleotide binding protein 1	+	+
PLCB3	phospholipase C, beta 3 (phosphatidylinositol-specific)	-	-
EHD4	EH domain containing 4	-	-
CSNK2A1	Casein kinase 2, alpha 1	+	+
FKBP3	FK506 binding protein 3	+	-
NPM1	Nucleophosmin	+	+
STRAP	Serine/threonine kinase receptor associated protein	+	-
G3BP1	Ras-GTPase-activating protein-binding protein 1	+	+
10. Cell cycle regulators
TXLNA	Taxilin alpha	+	+
RCC1	Regulator of chromosome condensation 1	-	+
RCC2	RCC1-like	-	+
MCM5	Minichromosome maintenance complex component 5	+	-
MCM6	Minichromosome maintenance complex component 6	+	-
PA2G4	Proliferation-associated 2G4	+	-
CAPRIN1	cell cycle associated protein 1	+	+
SEP7	Septin 7	+	+
11. Regulators of apoptosis
PRDX1	Peroxiredoxin 1	+	-
CCDC6	Coiled coil domain containing 6	-	+
API5	Apoptosis inhibitor 5	-	+
12. Transcriptional regulators
WDR61	WD repeat domain 61	-	-
YY1	YY1 transcription factor	-	-
TAF15	RNA polymerase II, TATA box binding protein (TBP)-associated factor	+	-
SND1	staphylococcal nuclease and tudor domain containing 1	+	-
STAT1	Signal transducer and activator of transcription 1	+	-
THOC4	THO complex 4	+	+
BTF3	Basic transcription factor 3	+	-
YAP1	Yes-associated protein 1	-	-
PQBP1	Polyglutamine binding protein 1	-	+
HABP4	hyaluronan binding protein 4	-	-
NONO	Non-POU domain containing, octamer-binding	+	-
TRIM25	tripartite motif-containing 25	+	-
TRIM28	Tripartite motif-containing 28	+	+
FUBP1	Far upstream element (FUSE) binding protein 1	+	-
FUBP3	far upstream element (FUSE) binding protein 3	-	-
YBX1	Y box binding protein 1	+	+
ILF3	Interleukin enhancer binding factor 3	+	-
13. Kinases and phosphatases
PKM2	pyruvate kinase, muscle	-	+
MAP4K4	mitogen-activated protein kinase kinase kinase kinase 4	-	-
STK24	Serine/threonine kinase 24	+	-
14. Protein transport
XPO5	Exportin 5	-	-
TNPO1	Transportin1	+	-
KPNA2	karyopherin alpha 2 (RAG cohort 1, importin alpha 1)	-	+
IMB1	Importin beta-1 subunit	+	-
SEC23A	Protein transport protein Sec23A	+	+
SEC24A	Protein transport protein Sec24A	-	-
15. Other diverse functions
FAM98A	family with sequence similarity 98, member A	-	-
C19orf53	Leydig cell tumor 10 kDa protein	-	-
NCL	Nucleolin	+	-
POTEF	Similar to protein expressed in prostate, ovary, testis, and placenta 2	-	+
CROCC	Ciliary rootlet coiled-coil, rootletin	-	-
MAT2A	Methionine adenosyltransferase II, alpha	+	-
ZC3H15	Zinc finger CCCH-type containing 15	+	-
SDCCAG1	Serologically defined colon cancer antigen 1	+	-
TPR	Translocated promoter region	+	+
RRM1	Ribonucleotide reductase M1	+	+
ATXN2L	Ataxin 2-like	+	-
HSPA9	heat shock 70kDa protein 9 (mortalin)	+	-
SERPINH1	Serpin peptidase inhibitor, clade H (heat shock protein 47), member 1	+	+
MDH2	malate dehydrogenase 2, NAD	+	+
AASDHPPT	Aminoadipate-semialdehyde dehydrogenase- phosphopantetheinyl transferase	+	-
PHGDH	Phosphoglycerate dehydrogenase	+	-
HDLBP	High density lipoprotein binding protein	+	-

## Sheet: Table S4
Table S4. Putative T877A-AR interacting proteins identified from unstimulated cells
Gene ID	Description	wtAR	AR Q0
		-MB	-MB
1. Components of chromatin remodeling complex
TOP1	Topoisomerase (DNA) I	+	-
KDM5B	Lysine (K)-specific demethylase 5B	-	-
MCM2	Minichromosome maintenance complex component 2	+	-
SPC24	Spindle pole body component 24 homolog	+	-
2. Histones, histone modifiers: acetylases, deactylates, methylatranserases, demethylases
HIST1H2BL	Histone cluster 1, H2bl	-	-
HIST1H2BO	Histone cluster 1, H2bo	+	-
HIST1H1E	Histone cluster 1, H1e	-	+
CARM1	Coactivator-associated arginine methyltransferase 1	-	+
DNMT1	DNA (cytosine-5)-methyltransferase 1	+	-
3. Components of the ubiquitination/proteosome pathway
CUL1	Cullin 1	+	-
CUL4B	Cullin 4B	-	-
PCNP	PEST proteolytic signal containing nuclear protein	-	-
ECM29	ECM29 homolog, proteasome accessory protein	+	-
PSMD1	Proteasome 26S subunit, non-ATPase, 1	+	-
USP7	Ubiquitin specific peptidase 7	+	-
HSPB1	Heat shock protein 27	+	+
UBAP2L	Ubiquitin associated protein 2-like	+	+
4. Splicing and RNA metabolism
HNRNPA1	hnRNP A1	+	+
HNRNPAB	hnRNP A/B	+	+
HNRNPA2B1	hnRNP A2/B1	+	+
HNRNPD	hnRNP D	+	+
HNRPDL	hnRNP D-like	+	-
HNRNPF	hnRNP F	+	-
HNRNPH	hnRNP H	-	+
HNRNPI	hnRNP I	+	+
HNRNPK	hnRNP K	+	+
HNRNPL	hnRNP L	+	+
HNRNPM	hnRNP M	+	+
HNRNPQ	hnRNP Q	+	-
HNRNPU	hnRNP U	+	+
PCBP1	Poly(rC) binding protein 1	-	+
STAU1	Staufen, RNA binding protein, homolog 1	-	+
FUS	Fusion (involved in t(12;16) in malignant liposarcoma	+	+
SRP9	Signal recognition particle 9kDa	-	+
SRP14	Signal recognition particle 14kDa (homologous Alu RNA binding protein)	-	-
SNRPB	Small nuclear ribonucleoprotein polypeptides B and B1	+	+
SF1	Splicing factor 1	+	+
SFRS3	Splicing factor, arginine/serine-rich 3	+	+
SFRS6	Splicing factor, arginine/serine-rich 6	-	-
KHSRP	KH-type splicing regulatory protein	+	+
YTHDC1	YTH domain containing 1	-	-
TRA2B	Transformer 2 homolog; splicing factor, arginine/serine-rich 10	+	-
SFRS12	Splicing factor, arginine/serine-rich 12	+	-
SF3B2	Splicing factor 3B, subunit 2	+	+
SF3B3	Splicing factor 3B, subunit 3	+	+
RPSA	40S ribosomal protein SA	+	-
RPS2	40S ribosomal protein S2	+	-
RPS3A	40S ribosomal protein 3a	+	+
RPS4Y1	Ribosomal protein S4, Y-linked 1	-	-
RPS5	40S ribosomal protein S5	+	+
RPS6	40S ribosomal protein S6	-	+
RPS7	40S ribosomal protein S7	+	+
RPS8	40S ribosomal protein S8	+	+
RPS10	40S ribosomal protein S10	+	+
RPS12	40S ribosomal protein S12	-	+
RPS13	40S ribosomal protein S13	+	-
RPS14	40S ribosomal protein S14	-	-
RPS15	40S ribosomal protein S15	+	+
RPS19	40S ribosomal protein S19	+	+
RPS20	40S ribosomal protein S20	-	+
RPS21	40S ribosomal protein S21	+	-
RPS24	40S ribosomal protein S24	+	-
RPS25	40S ribosomal protein S25	-	+
RPS28	40S ribosomal protein S28	+	+
RPS29	40S ribosomal protein S29	+	+
RPL3	60S ribosomal protein L3	-	+
RPL6	60S ribosomal protein L6	+	-
RPL7A	60S ribosomal protein L7a	+	+
RPL8	60S ribosomal protein L8	+	+
RPL9	60S ribosomal protein L9	+	-
RPL12	60S ribosomal protein L12	+	+
RPL17	60S ribosomal protein L17	+	+
RPL18	60S ribosomal protein L18	+	+
RPL21	60S ribosomal protein L21	+	+
RPL22	60S ribosomal protein L22	+	+
RPL23A	60S ribosomal protein L23a	-	+
RPL26	60S ribosomal protein L26	+	+
RPL27	60S ribosomal protein L27	+	+
RPL27A	60S ribosomal protein L27a	-	-
RPL31	60S ribosomal protein L31	+	+
RPL34	60S ribosomal protein L34	-	-
RPL35	60S ribosomal protein L35	-	+
RPL36	60S ribosomal protein L36	-	+
RPL37	60S ribosomal protein L37	+	-
RPL37A	60S ribosomal protein L37a	+	-
RPLP0	60S ribosomal protein P0	+	+
RPLP2	60S ribosomal protein P2	+	+
RSL1D1	Ribosomal L1 domain containing 1	-	-
EFTUD2	Elongation factor Tu GTP binding domain containing 2	+	-
AGFG1	ArfGAP with FG repeats 1	-	-
C1QBP	Complement component 1, q subcomponent binding protein	+	-
SNRPD1	Small nuclear ribonucleoprotein D1	+	+
SNRPD3	Small nuclear ribonucleoprotein D3 polypeptide	+	+
SNRPN	Small nuclear ribonucleoprotein polypeptide N	-	-
SNRP70	Small nuclear ribonucleoprotein 70kDa polypeptide	+	+
SNRP200	Small nuclear ribonucleoprotein 200kDa polypeptide	-	+
CSTF2	Cleavage stimulation factor, 3' pre-RNA, subunit 2	-	+
SRRM2	Serine/arginine repetitive matrix 2	-	+
INTS9	Integrator complex subunit 9	-	-
FXR1	Fragile X mental retardation, autosomal homolog 1	-	+
SERBP1	SERPINE1 mRNA binding protein 1	+	+
DDX1	DEAD (Asp-Glu-Ala-Asp) box polypeptide 1	+	+
DDX21	DEAD (Asp-Glu-Ala-Asp) box polypeptide 21	-	-
DDX3Y	DEAD (Asp-Glu-Ala-Asp) box polypeptide 3, Y-linked	+	-
CPSF6	Cleavage and polyadenylation specific factor 6	-	+
EIF1AY	Eukaryotic translation initiation factor 1A, Y-linked	-	-
EIF2A	Eukaryotic translation initiation factor 2A	+	+
EIF4A2	Eukaryotic translation initiation factor 4A, isoform 2	+	-
EIF4G1	Eukaryotic translation initiation factor 4 gamma, 1	+	+
EIF5A	Eukaryotic translation initiation factor 5A	+	-
EEF1A1	Eukaryotic translation elongation factor 1 alpha 1	+	+
EEF1B2	Eukaryotic translation elongation factor 1 beta	+	-
EEF1D	Eukaryotic translation elongation factor 1 delta	+	+
EEF1E1	Eukaryotic translation elongation factor 1 epsilon 1	+	+
PABPC1L	Poly(A) binding protein, cytoplasmic 1-like	+	+
PABPC4	Poly(A) binding protein, cytoplasmic 4	+	+
NUDT21	Nudix (nucleoside diphosphate linked moiety X)-type motif 21	-	-
NARS	Asparaginyl-tRNA synthetase	+	-
CIRBP	Cold inducible RNA binding protein	+	-
5. DNA repair
APEX1	APEX nuclease (multifunctional DNA repair enzyme) 1	+	-
KU70	ATP-dependent DNA helicase II, 70 kDa subunit	+	+
KU80	X-ray repair complementing defective repair in Chinese hamster cells 5	+	+
PARP1	Poly (ADP-ribose) polymerase 1	+	-
6. Chaperones and cochaperones
BAG3	BCL2-associated athanogene 3	+	+
TCP1	T-complex 1	+	-
CCT2	Cchaperonin containing TCP1, subunit 2	+	+
CCT3	Chaperonin containing TCP1, subunit 3	+	-
CCT6A	Chaperonin containing TCP1, subunit 6A	+	-
CCT8	Chaperonin containing TCP1, subunit 8	+	-
TRAP1	TNF receptor-associated protein 1	-	+
NPM1	Nucleophosmin 1	-	-
EDEM1	ER degradation enhancer, mannosidase alpha-like 1	-	-
DNAJ	DnaJ	+	+
HSPA5	Heat shock 70kDa protein 5 (glucose-regulated protein, 78kDa)	-	+
HSC71	Heat shock cognate protein, 71kD	+	+
HSP90	Heat shock protein 90kD	+	+
7. Cytoskeletal proteins
CCDC6	Coiled-coil domain containing 6	-	+
CTTN	Cortactin	-	-
TPM1	Tropomyosin 1	-	-
MAP4	Microtubule-associated protein 4	+	+
VASP	Vasodilator-stimulated phosphoprotein	-	+
TRIP6	Thyroid hormone receptor interactor 6	-	+
MITD1	Microtubule interacting and transport, domain containing 1	-	-
ACTN3	Alpha-actinin-3	-	-
CNN2	Calponin 2	+	-
MYH9	Myosin, heavy chain 9, non-muscle	-	-
MYO15A	Myosin XVA	-	-
ACTA1	Actin, alpha 1	+	+
ACTN4	Actinin, alpha 4	+	-
LMNA	Lamin A/C	+	-
FLNA	Filamin A	-	-
FLNC	Filamin C	+	+
TUB	Tubulin	+	+
SPTAN1	Spectrin, alpha, non-erythrocytic 1	+	-
TJP1	Tight-junction protein 1	+	+
CORO1C	Coronin, actin binding protein, 1C	+	-
9. Proteins involved in signal transduction pathway
TXLNA	Taxilin alpha	-	-
C2CD3	C2 calcium-dependent domain containing 3	-	-
YWHAQ	Tyrosine 3-monooxygenase/tryptophan 5-monooxygenase activation protein, theta polypeptide	-	+
FLG2	Filaggrin family member 2	-	-
ZYX	Zyxin	-	+
SHROOM3	Shroom family member 3	-	-
ANXA2	Annexin A2	-	+
PLCB3	Phospholipase C, beta 3 (phosphatidylinositol-specific)	-	-
CSNK2A1	Casein kinase 2, alpha 1	+	-
G3BP1	Ras-GTPase-activating protein-binding protein 1	+	+
HINT1	Histidine triad nucleotide binding protein 1	+	-
10. Cell cycle regulators
SEP2	Septin 2	+	+
SEP7	Septin 7	+	+
PA2G4	proliferation-associated 2G4	+	+
PDLIM7	PDZ and LIM domain 7 (enigma)	-	-
TPR	Nuclear pore complex-associated protein TPR	-	+
RCC1	Regulator of chromosome condensation 1	-	-
RCC2	Regulator of chromosome condensation 2	-	-
CAPRIN1	Cell cycle associated protein 1	+	+
11. Regulators of apoptosis
API5	Apoptosis inhibitor 5	-	-
12. Transcriptional regulation
SAFB	Scaffold attachment factor B	-	+
LUZP1	Leucine zipper protein 1	-	-
FUBP3	Far upstream element (FUSE) binding protein 3	-	+
TLE3	Transducin-like enhancer of split 3 (E(sp1) homolog, Drosophila)	-	+
TP53	Tumor protein p53	-	-
CRTC1	CREB regulated transcription coactivator 1	-	-
PQBP1	Polyglutamine binding protein 1	-	-
PSPC1	Paraspeckle component 1	-	+
YBX1	Y box binding protein 1	-	+
YAP1	Yes-associated protein 1	-	+
CSDE1	Cold shock domain containing E1, RNA-binding	-	-
CSDA	Cold shock domain protein A	-	-
THOC4	THO complex 4	-	+
PSIP1	PC4 and SFRS1 interacting protein 1	-	-
DBC1	Deleted in breast cancer 1	+	+
TRIM28	Tripartite motif-containing 28	+	+
13. Kinases and phosphatases
PKM2	Pyruvate kinase, muscle	+	+
CSNK1A1L	Casein kinase 1, alpha 1-like	-	-
EIF2AK2	Eukaryotic translation initiation factor 2-alpha kinase 2	+	-
14. Protein transport
KIF13A	Kinesin family member 13A	-	-
SEC23A	Protein transport protein Sec23A	+	-
SEC23B	Sec23 homolog B	+	-
SEC23IP	SEC23 interacting protein	-	+
KPNA2	Karyopherin alpha 2 (RAG cohort 1, importin alpha 1)	-	+
15. Other diverse functions
DCD	Dermcidin	-	-
AHNAK	AHNAK nucleoprotein	-	+
RRM1	Ribonucleotide reductase M1	+	-
S100A16	S100 calcium binding protein A16	-	-
MDH2	Malate dehydrogenase 2, NAD (mitochondrial)	+	-
HSD17B10	Hydroxysteroid (17-beta) dehydrogenase 10	-	-
FAM50A	Family with sequence similarity 50, member A	-	-
FAM120A	Family with sequence similarity 120A	-	+
POTEF	Similar to protein expressed in prostate, ovary, testis, and placenta 2	+	+
NCL	Nucleolin	+	+
WDR1	WD repeat domain 1	+	-
SERPINH1	Serpin peptidase inhibitor, clade H (heat shock protein 47), member 1	+	-

## Sheet: Table S5
Table S5. Putative 0CAG-AR interacting proteins identified from MB stimulated cells
Gene ID	Description	Present in wtAR	Present in AR T877A
		+MB	+MB
1. Components of chromatin remodeling complex
CEP170	Centrosomal protein 170kDa	-	+
MCM3	Minichromosome maintenance complex component 3	-	-
BUB3	BUB3 budding uninhibited by benzimidazoles 3 homolog	+	-
RNF20	Ring finger protein 20	-	-
NAP1L1	Nucleosome assembly protein 1-like 1	+	-
2. Histones, histone modifiers: acetylases, deactylates, methylatranserases, demethylases
HIST1	Histone, H1	+	-
HIST1H1C	Histone cluster 1, H1c	-	+
HIST1H1E	Histone cluster 1, H1e	-	+
H1F0	H1 histone family, member 0	-	-
HIST1H2AE	Histone cluster 1, H2ae	-	-
H2AFV	H2A histone family, member V	-	-
HIST2H2BE	Histone cluster 2, H2be	-	+
HIST1H2BL	Histone cluster 1, H2bl	-	+
DNMT1	DNA (cytosine-5)-methyltransferase 1	+	+
3. Components of the ubiquitination/proteosome pathway
ECM29	ECM29 homolog, proteasome accessory protein	+	+
TPP2	Tripeptidyl peptidase II	-	-
CUL3	Cullin 3	-	-
PCNP	PEST proteolytic signal containing nuclear protein	-	+
PSMD1	Proteasome 26S subunit, non-ATPase, 1	+	+
CBL	Cas-Br-M (murine) ecotropic retroviral transforming sequence	-	-
NOSIP	Bitric oxide synthase interacting protein	-	-
PSMG4	Proteasome (prosome, macropain) assembly chaperone 4	-	+
HSPB1	Heat shock protein 27	-	-
MYLIP	Myosin regulatory light chain interacting protein	-	-
UBAP2	Ubiquitin associated protein 2	-	-
UBAP2L	Ubiquitin associated protein 2-like	+	-
USP39	Ubiquitin specific peptidase 39	-	-
USP7	Ubiquitin specific peptidase 7	+	+
USP8	Ubiquitin specific peptidase 8	-	-
USP9X	Ubiquitin specific peptidase 9, X-linked	+	-
USP9Y	Ubiquitin specific peptidase 9, Y-linked	-	-
USP10	Ubiqutin specific peptidase 10	-	-
VCPIP1	Valosin containing protein (p97)/p47 complex interacting protein 1	-	-
4. Splicing and RNA metabolism
RALYL	RALY RNA binding protein-like	-	-
ATXN2	Ataxin 2	-	-
PTBP2	Polypyrimidine tract binding protein 2	-	-
ROD1	ROD1 regulator of differentiation 1	-	-
ELAVL1	ELAV (embryonic lethal, abnormal vision, Drosophila)-like 1	-	-
STAU1	Staufen, RNA binding protein, homolog 1	-	-
STAU2	Staufen, RNA binding protein, homolog 2	-	-
RNPS1	RNA binding protein S1, serine-rich domain	-	-
EMG1	EMG1 Nucleolar protein homologue	-	-
PRMT3	Protein arginine methyltransferase 3	-	-
LUC7L	LUC7 like	+	+
LUC7L2	LUC7 like-2	+	+
SRP14	Signal recognition particle 14kDa (homologous Alu RNA binding protein)	-	+
DAZAP1	DAZ associated protein 1	+	-
KHSRP	KH-type splicing regulatory protein	+	+
SRRM2	Serine/arginine repetitive matrix 2	-	+
HNRNPA0	hnRNPA0	+	-
HNRNPA1	hnRNPA1	+	+
HNRNPA2B1	hnRNP A2/B1	-	+
HNRNPA3	hnRNPA3	-	-
HNRNPAB	hnRNP A/B	+	+
HNRNPD	hnRNP D	+	+
HNRPDL	hnRNP D-like	+	+
PCBP1	Poly(rC) binding protein 1	-	+
PCBP2	Poly(rC) binding protein 2	-	+
HNRNPF	hnRNP F	+	+
RBMX	RNA binding motif protein, X-linked	-	-
RBMXL2	RNA binding motif protein, X-linked-like 2	-	-
HNRNPH1	hnRNP H1	+	+
HNRNPH2	hnRNP H2	+	+
HNRNPH3	hnRNP H3	+	-
HNRNPI	hnRNP I (polypyrimidine tract binding protein 1)	-	+
HNRNPK	hnRNP K	-	+
HNRNPL	hnRNP L	+	-
HNRNPM	hnRNP M	+	+
HNRNPQ	hnRNP Q	+	+
HNRNPR	hnRNP R	-	-
NUDT21	Nudix (nucleoside diphosphate linked moiety X)-type motif 21	-	-
FUS	Fusion (involved in t(12;16) in malignant liposarcoma)	-	+
RBM3	RNA binding motif (RNP1, RRM) protein 3	+	+
RBM15	RNA binding motif protein 15	-	-
ZCCHC8	Zinc finger, CCHC domain containing 8	-	-
SRP9	Signal recognition particle 9kDa	-	+
CSDE1	Cold shock domain containing E1, RNA-binding	+	+
SERBP1	SERPINE1 mRNA binding protein 1	+	+
DDX1	DEAD (Asp-Glu-Ala-Asp) box polypeptide 1	+	+
DDX3Y	DEAD (Asp-Glu-Ala-Asp) box polypeptide 3, Y-linked	-	-
DDX5	DEAD (Asp-Glu-Ala-Asp) box polypeptide 5	+	+
DDX6	DEAD (Asp-Glu-Ala-Asp) box polypeptide 6	+	-
DDX17	DEAD (Asp-Glu-Ala-Asp) box polypeptide 17	-	-
DDX21	DEAD (Asp-Glu-Ala-Asp) box polypeptide 21	-	+
DDX29	DEAD (Asp-Glu-Ala-Asp) box polypeptide 29	-	-
DHX9	DEAH (Asp-Glu-Ala-His) box polypeptide 9	-	-
DHX15	DEAH (Asp-Glu-Ala-His) box polypeptide 15	-	-
DHX29	DEAH (Asp-Glu-Ala-His) box polypeptide 29	+	-
DHX46	DEAH (Asp-Glu-Ala-His) box polypeptide 46	-	-
BAT1	HLA-B associated transcript 1	-	-
SF1	Splicing factor 1	+	+
SF3A2	Splicing factor 3A, subunit 2	+	-
SF3A3	Splicing factor 3A, subunit 3	+	+
SF3B1	Splicing factor 3B, subunit 1	+	+
SF3B2	Splicing factor 3B, subunit 2	+	+
SFRS1	Splicing factor, arginine/serine-rich 1	-	-
SFRS2	Splicing factor, arginine/serine-rich 2	-	+
SFRS3	Splicing factor, arginine/serine-rich 3	-	+
SFRS12	Splicing factor, arginine/serine-rich 12	-	+
TRA2B	Transformer 2 homolog; splicing factor, arginine/serine-rich 10	+	+
PRPF6	PRP6 pre-mRNA processing factor 6	+	-
PRPF19	PRP19/PSO4 pre-mRNA processing factor 19	+	-
PRPF40A	PRP40 pre-mRNA processing factor 4, homolog A	-	+
SNRPD1	Small nuclear ribonucleoprotein D1	+	+
SNRPD2	Small nuclear ribonucleoprotein D2	+	-
SNRPD3	Small nuclear ribonucleoprotein D3	-	+
SNRPE	Small nuclear ribonucleoprotein E	+	-
RSL1D1	ribosomal L1 domain containing 1	-	+
RPS3A	40S ribosomal protein 3a	+	+
RPS4X	40S ribosomal protein S4; X isoform	+	+
RPS5	40S ribosomal protein S5	+	+
RPS6	40S ribosomal protein S6	+	+
RPS9	40S ribosomal protein S9	+	+
RPS10	40S ribosomal protein S10	+	-
RPS11	40S ribosomal protein S11	-	-
RPS12	40S ribosomal protein S12	-	+
RPS13	40S ribosomal protein S13	+	+
RPS14	40S ribosomal protein S14	-	+
RPS16	40S ribosomal protein S16	-	-
RPS17	40S ribosomal protein S17	+	-
RPS18	40S ribosomal protein S18	+	-
RPS19	40S ribosomal protein S19	+	+
RPS20	40S ribosomal protein S20	-	+
RPS24	40S ribosomal protein S24	+	+
RPS25	40S ribosomal protein S25	-	-
RPS26	40S ribosomal protein S26	-	-
RPS27	40S ribosomal protein S27	-	-
RPS28	40S ribosomal protein S28	-	+
RPS29	40S ribosomal protein S29	-	+
RPL3	60S ribosomal protein L3	+	-
RPL4	60S ribosomal protein L4	+	+
RPL6	60S ribosomal protein L6	+	+
RPL7	60S ribosomal protein L7	+	+
RPL7A	60S ribosomal protein L7a	+	+
RPL8	60S ribosomal protein L8	+	+
RPL10	60S ribosomal protein L10	-	-
RPL11	60S ribosomal protein L11	-	-
RPL12	60S ribosomal protein L12	+	+
RPL13	60S ribosomal protein L13	+	+
RPL17	60S ribosomal protein L17	+	+
RPL18	60S ribosomal protein L18	+	+
RPL18A	60S ribosomal protein L18a	-	+
RPL19	60S ribosomal protein L19	-	-
RPL21	60s ribosomal protein L21	+	+
RPL22	60S ribosomal protein L22	-	+
RPL23A	60S ribosomal protein L23a	-	+
RPL24	60S ribosomal protein L24	-	-
RPL26	60S ribosomal protein L26	-	-
RPL27A	60S ribosomal protein L27a	-	+
RPL28	60S ribosomal protein L28	-	-
RPL31	60S ribosomal protein L31	+	+
RPL32	60S ribosomal protein L32	-	-
RPL34	60S ribosomal protein L34	-	+
RPL35	60S ribosomal protein L35	+	-
RPL36	60S ribosomal protein L36	-	+
RPL36A	60S ribosomal protein L36a	-	-
RPL37	60S ribosomal protein L37	-	-
RPL37a	60S ribosomal protein L37a	+	+
RPLP1	60S ribosomal protein P1	+	-
MRPS35	Mitochondrial ribosomal protein S35	-	-
EIF1AY	Eukaryotic translation initiation factor 1A, Y-linked	-	+
EEF1A2	Eukaryotic translation elongation factor 1 alpha 2	+	-
EIF2A	Eukaryotic translation initiation factor 2A	+	+
EIF3A	Eukaryotic translation initiation factor 3A	-	-
EIF3C	Eukaryotic translation initiation factor 3C	-	-
EIF3E	Eukaryotic translation initiation factor 3E	-	-
EIF4A1	Eukaryotic translation initiation factor 4A, 1	+	+
EIF4A2	Eukaryotic translation initiation factor 4A, 2	-	+
EIF4E	Eukaryotic translation initiation factor 4E	+	-
EIF4G2	Eukaryotic translation initiation factor 4 gamma, 2	-	-
EIF4G3	Eukaryotic translation initiation factor 4 gamma, 3	+	+
EIF5A	Eukaryotic translation initiation factor 5A	+	+
EEF1A1	Eukaryotic translation elongation factor 1 alpha 1	+	+
EEF1B2	Eukaryotic translation elongation factor 1 beta 2	+	+
EIF3D	Eukaryotic translation initiation factor 3, subunit D	-	-
EIF3H	Eukaryotic translation initiation factor 3, subunit H	+	-
EEF1D	Eukaryotic translation elongation factor 1 delta	+	+
EEF1G	Eukaryotic elongation factor 1-gamma	+	+
EFTUD2	Elongation factor Tu GTP binding domain containing 2	-	+
EDC3	Enhancer of mRNA decapping 3	-	-
EDC4	Enhancer of mRNA decapping 4	-	-
SNRPA	U1 small nuclear ribonulceoprotein A	+	-
SNRPB	Small nuclear ribonucleoprotein polypeptides B and B1	-	+
SNRPC	Small nuclear ribonucleoprotein polypeptide C	-	-
SNRPF	Small nuclear ribonulceoprotein F	-	-
C19orf29	Chromosome 19 open reading frame 29	-	-
SNRP70	U1 small nuclear ribonucleoprotein 70 kDa	+	+
SNRNP200	Small nuclear ribonucleoprotein 200kDa (U5)	+	+
U2AF1	U2 small nuclear RNA auxiliary factor 1	-	-
U2AF2	U2 small nuclear RNA auxiliary factor 2	+	-
SART1	Squamous cell carcinoma antigen recognized by T cells	-	-
PABPC1	Poly(A) binding protein, cytoplasmic 1	+	+
PABPC4	Poly(A) binding protein, cytoplasmic 4	-	+
PABPC5	Poly(A) binding protein, cytoplasmic 5	+	-
CD2BP2	CD2 (cytoplasmic tail) binding protein 2	-	-
PAIP2	Poly(A) binding protein interacting protein 2	-	-
LARP4	La ribonucleoprotein domain family, member 4	-	-
FIP1L1	FIP1 like 1	-	-
RBM25	RNA binding motif protein 25	-	-
EWSR1	Ewing sarcoma breakpoint region 1	+	-
FMR1	Fragile X mental retardation 1	-	-
FXR1	Fragile X mental retardation, autosomal homolog 1	+	+
NUFIP2	Nuclear fragile X mental retardation protein interacting protein 2	+	-
SMU1	Smu-1 suppressor of mec-8 and unc-52 homolog	-	-
FARSA	Phenylalanyl-tRNA synthetase, alpha subunit	+	-
KARS	lysyl-tRNA synthetase	+	-
LARS	Leucyl-tRNA synthetase	+	-
QARS	Glutaminyl-tRNA synthetase	+	-
XRN2	5'-3' exoribonuclease 2	+	-
UPF1	UPF1 regulator of nonsense transcripts homolog	+	-
CIRBP	Cold inducible RNA binding protein	+	+
5. DNA repair
UACA	Uveal autoantigen with coiled-coil domains and ankyrin repeats	-	-
KU70	ATP-dependent DNA helicase II, 70 kDa subunit	+	+
KU80	ATP-dependent DNA helicase II, 80 kDa subunit	-	+
MCM4	Minichromosome maintenance complex component 4	+	-
6. Chaperones and cochaperones
BAG3	BCL2-associated athanogene 3	+	+
CSP	Cold shock protein	-	+
CCT2	Chaperonin containing TCP1, subunit 2	-	-
CCT3	Chaperonin containing TCP1, subunit 3	+	+
CCT4	Chaperonin containing TCP1, subunit 4	+	-
CCT6A	Chaperonin containing TCP1, subunit 6A	+	-
DNAJ	Dna J	+	+
HSPD1	Heat shock 60kDa protein 1	+	-
HSPA5	Heat shock 70kDa protein 5 (glucose-regulated protein, 78kDa)	-	+
HSP70	Heat shock protein 70kD	+	+
HSP90	Heat shock protein 90kD	+	+
7. Cytoskeletal proteins
ACTA1	Actin, alpha 1	+	-
ACTA2	Actin, alpha 2, smooth muscle, aorta	-	+
ACTG1	Actin, gamma 1	-	-
ACTBL2	Beta-actin-like protein 2	-	-
CAPZA1	Capping protein (actin filament) muscle Z-line, alpha 1	-	-
ACTR1A	ARP1 actin-related protein 1 homolog A, centractin alpha	+	-
DIAPH3	Diaphanous homolog 3	-	-
MITD1	MIT, microtubule interacting and transport, domain containing 1	-	+
MAPRE2	Microtubule-associated protein, RP/EB family, member 2	-	-
LMNB2	Lamin B2	-	-
MYL6B	Myosin, light chain 6B	+	+
CCDC51	Coiled-coil domain containing 51	-	-
CORO1C	Coronin, actin binding protein, 1C	-	+
LMOD2	Leiomodin 2 (cardiac)	-	-
MATR3	Matrin 3	-	-
ENAH	Enabled homolog	-	-
CYFIP1	Cytoplasmic FMR1 interacting protein 1	-	-
KIF1A	Kinesin family member 1A	-	-
KIF1B	Kinesin family member 1B	-	-
CCDC6	Coiled-coil domain containing 6	-	-
HOOK3	Hook homolog 3	-	-
SHROOM3	Shroom family member 3	-	+
AMOTL2	Angiomotin like 2	-	-
PLEC1	Plectin 1, intermediate filament binding protein 500kDa	-	-
WASL	Wiskott-Aldrich syndrome-like	-	-
WASF2	WAS protein family, member 2	-	-
ACTN2	Actinin, alpha 2	-	-
ACTN3	Actinin, alpha 3	-	+
ACTN4	Actinin, alpha 4	+	+
CNN2	Calponin 2	-	-
EZR	Ezrin	-	-
TPM1	Tropomyosin 1 (alpha)	-	-
KLRAQ1	KLRAQ motif containing 1	-	-
MPRIP	Myosin phosphatase Rho interacting protein	-	-
PALLD	Palladin, cytoskeletal associated protein	-	-
DYNC1LI1	Dynein, cytoplasmic 1, light intermediate chain 1	-	-
DYNC1I2	Dynein, cytoplasmic 1, intermediate chain 2	-	-
DYNC1	Dynein, cytoplasmic 1	+	-
FLNC	Filamin C	-	+
MACF1	Microtubule-actin crosslinking factor 1	+	-
SPTAN1	Spectrin, alpha, non-erythrocytic 1	+	+
TUB	Tubulin	+	+
TJP1	Tight-junction protein 1	+	+
MSN	Moesin	+	-
9. Proteins involved in signal transduction pathway, scaffolds and adaptors
GIGYF2	Grb10 interacting GYF protein 2	-	-
GPR113	G protein coupled receptor 113	-	-
HMMR	Hyaluronan mediated motility receptor	-	-
TLE3	Transducin-like enhancer of split 3 (E(sp1) homolog, Drosophila)	-	-
IGF2BP2	Insulin-like growth factor 2 mRNA binding protein 2	-	-
IGF2BP3	Insulin-like growth factor 2 mRNA binding protein 3	-	-
ZYX	Zyxin	-	-
IRS2	Insulin receptor substrate 2	-	-
ARHGEF7	Rho guanine nucleotide exchange factor (GEF) 7	-	-
NCKAP1	NCK associated protein 1	-	-
TRIP6	Thyroid receptor-interacting protein 6	-	+
PNN	Pinin	-	-
TBC1D2	TBC1 domain family, member 2	-	-
ERC1	ELKS/RAB6-interacting/CAST family member 1	-	-
ZMYND8	Zinc finger, MYND-type containing 8	-	-
YWHAZ	Tyrosine 3-monooxygenase/tryptophan 5-monooxygenase activation protein, zeta polypeptide	-	-
	Ras association (RalGDS/AF-6) and pleckstrin homology domains 1
RAPH1	Itchy homolog E3 ubiquitin protein ligase	-	-
ITCH	Osteoclast stimulating factor 1	-	-
OSTF1	Tubulin tyrosine ligase-like family, member 12	-	-
TTLL12	Casein kinase 1, alpha 1-like	-	-
CSNK1A1L	Casein beta	-	+
CSN2	Annexin A2	-	-
ANXA2	Histidine triad nucleotide binding protein 1	-	-
HINT1		+	+
PLCB3	Phospholipase C, beta 3 (phosphatidylinositol-specific)	-	-
EHD4	EH domain containing 4	-	-
DNM2	Dynamin 2	+	-
EPS8	Epidermal growth factor receptor pathway substrate 8	+	-
HIPA	Huntingtin-interacting protein A	+	-
CSNK2A1	Casein kinase 2, alpha 1	+	+
FKBP3	FK506 binding protein 3	+	-
NPM1	Nucleophosmin	+	+
CIT	Citron (rho-interacting, serine/threonine kinase 21)	+	-
PDAP1	PDGFA associated protein 1	+	+
STRAP	Serine/threonine kinase receptor associated protein	+	-
SKP1	S-phase kinase-associated protein 1	+	-
G3BP1	Ras-GTPase-activating protein-binding protein 1	+	+
G3BP2	GTPase activating protein (SH3 domain) binding protein 2	-	-
SAM68	GAP-associated tyrosine phosphoprotein p62	+	-
10. Cell cycle regulators
POLDIP3	DNA polymerase delta interacting protein 3	-	-
CDK9	Cyclin-dependent kinase 9	-	-
CDC20	Cell division cycle 20 homolog	-	-
NDC80	NDC80 homolog, kinetochore complex component	-	-
NDEL1	NudE nuclear distribution gene E homolog (A. nidulans)-like 1	-	-
CUL1	Cullin 1	+	+
TXLNA	Taxilin alpha	+	+
RCC1	Regulator of chromosome condensation 1	-	+
RCC2	RCC1-like	-	+
MCM5	Minichromosome maintenance complex component 5	+	+
MCM6	Minichromosome maintenance complex component 6	+	-
PA2G4	Proliferation-associated 2G4	+	+
CAPRIN1	Cell cycle associated protein 1	+	+
SEP6	Septin 6	-	-
SEP7	Septin 7	+	+
11. Regulators of apoptosis
PRDX1	Peroxiredoxin 1	+	+
CCDC6	Coiled coil domain containing 6	-	+
API5	Apoptosis inhibitor 5	-	+
12. Transcriptional regulators
WDR61	WD repeat domain 61	-	-
YY1	YY1 transcription factor	-	-
NR3C2	Nuclear receptor subfamily 3, group C, member 2	-	-
TBR1	T-box, brain, 1	-	-
THRAP3	Thyroid hormone receptor associated protein 3	-	-
CARM1	Coactivator-associated arginine methyltransferase 1	-	-
SNW1	SNW domain containing 1	-	-
RUVBL2	RuvB-like 2	-	-
CREBBP	CREB binding protein	-	-
CNBP	CCHC-type zinc finger, nucleic acid binding protein	-	-
DRG1	Developmentally regulated GTP binding protein 1	-	-
CBFA2T3	Core-binding factor, runt domain, alpha subunit 2; translocated to, 3	-	-
MED4	Mediator complex subunit 4	-	-
TAF15	RNA polymerase II, TATA box binding protein (TBP)-associated factor	+	+
SAP18	Sin3A-associated protein, 18kDa	-	-
PPP1R13L	Protein phosphatase 1, regulatory (inhibitor) subunit 13 like	-	-
BCLAF1	BCL2-associated transcription factor 1	-	-
NCOA5	Nuclear receptor coactivator 5	-	-
SND1	Staphylococcal nuclease and tudor domain containing 1	+	-
PSPC1	Paraspeckle component 1	-	-
STAT1	Signal transducer and activator of transcription 1	+	-
THOC4	THO complex 4	+	+
BTF3	Basic transcription factor 3	+	-
YAP1	Yes-associated protein 1	-	+
HABP4	Hyaluronan binding protein 4	-	-
HTANoF1	HIV-1 Tat specific factor 1	+	-
NONO	Non-POU domain containing, octamer-binding	+	+
TRIM25	Tripartite motif-containing 25	+	-
TRIM28	Tripartite motif-containing 28	+	+
FUBP1	Far upstream element (FUSE) binding protein 1	+	+
FUBP3	Far upstream element (FUSE) binding protein 3	+	-
YBX1	Y box binding protein 1	+	+
ILF3	Interleukin enhancer binding factor 3	+	+
13. Kinases and phosphatases
WNK1	WNK lysine deficient protein kinase 1	-	-
SLK	STE20-like kinase	-	-
PKM2	Pyruvate kinase, muscle	-	+
MAP4K4	Mitogen-activated protein kinase kinase kinase kinase 4	-	+
STK24	Serine/threonine kinase 24	+	-
14. Protein transport
XPO5	Exportin 5	-	-
TNPO1	Transportin1	+	-
VPS37B	Vacuolar protein sorting 37 homolog B	-	-
NUP188	Nucleoporin 188kDa	-	-
NUP214	Nucleoporin 214kDa	-	-
KPNA2	Karyopherin alpha 2 (RAG cohort 1, importin alpha 1)	-	+
IMB1	Importin beta-1 subunit	+	+
SEC13	SEC13 like 1	-	-
SEC23A	Protein transport protein Sec23A	+	+
SEC24A	Protein transport protein Sec24A	-	+
SEC31A	Protein transport protein Sec31A	-	-
SEC23IP	SEC23 interacting protein	-	-
SCAMP3	Secretory carrier membrane protein 3	-	-
15. Other diverse functions
CAD	Glutamine dependent carbamoyl phosphate synthase	-	-
ARS2	Arsenite resistance protein 2	-	-
ALKBH5	AlkB, alkylation repair homolog 5	-	-
FAM120A	Family with sequence similarity 120, member A	-	-
YTHDF3	YTH domain family, member 3	-	-
GFPT1	Glutamine-fructose-6-phosphate transaminase 1	-	-
PRR19	Proline rich 19	-	-
BAT2	HLA-B associated transcript 2	-	-
BAT2D1	BAT2 domain containing 1	-	-
CCBL2	Cysteine conjugate-beta lyase 2	-	-
AHNAK	AHNAK nucleoprotein	-	-
OTUD4	OTU domain containing 4	-	-
NUDT13	Nudix (nucleoside diphosphate linked moiety X)-type motif 13	-	-
C4BPA	Complement component 4 binding protein, alpha	-	-
GSS	Glutathione synthetase	-	-
CDKN2AIPNL	CDKN2A interacting protein N-terminal like	-	-
SPECC1	Sperm antigen HCMOGT1	-	-
FAM98A	Family with sequence similarity 98, member A	-	-
C19orf53	Leydig cell tumor 10 kDa protein	-	-
NCL	Nucleolin	+	+
LOC653781	Similar to protein expressed in prostate, ovary, testis, and placenta 2	-	+
CROCC	Ciliary rootlet coiled-coil, rootletin	-	-
MAT2A	Methionine adenosyltransferase II, alpha	+	-
ZC3H15	Zinc finger CCCH-type containing 15	+	-
SDCCAG1	Serologically defined colon cancer antigen 1	+	-
TPR	Translocated promoter region	+	+
RRM1	Ribonucleotide reductase M1	+	+
ATXN2L	Ataxin 2-like	+	+
HSPA9	Heat shock 70kDa protein 9 (mortalin)	+	-
SERPINH1	Serpin peptidase inhibitor, clade H (heat shock protein 47), member 1	+	+
MDH2	Malate dehydrogenase 2, NAD	+	+
AASDHPPT	Aminoadipate-semialdehyde dehydrogenase- phosphopantetheinyl transferase	+	-
MTHFD1	Methylenetetrahydrofolate dehydrogenase (NADP+ dependent) 1	+	-
PHGDH	Phosphoglycerate dehydrogenase	+	+
TARDBP	TAR DNA binding protein	+	-
HDLBP	High density lipoprotein binding protein	+	+

## Sheet: Table S6
Table S6. Putative 0CAG-AR interacting proteins identified from unstimulated cells
Gene ID	Description	wtAR	AR T887A
		-MB	-MB
1. Components of chromatin remodeling complex
BUB3	Budding uninhibited by benzimidazoles 3 homolog	-	-
HDAC7	Histone deacetylase 7	-	-
MCM3	Minichromosome maintenance complex component 3	-	-
MCM5	Minichromosome maintenance complex component 5	-	-
SMC2	Structural maintenance of chromosomes 2	-	-
2. Histones, histone modifiers: acetylases, deactylates, methylatranserases, demethylases
H2B	Histone cluster 2, H2be	+	-
HIST2H2BF	Histone cluster 2, H2bf	-	-
HIST1H1E	Histone cluster 1, H1e	-	+
HIST1H1C	Histone cluster 1, H1c	-	-
HIST1H1D	Histone cluster 1, H1d	-	-
HIST1H1T	Histone cluster 1, H1t	-	-
HIST1H2AB	Histone cluster 1, H2ab	-	-
CARM1	Coactivator-associated arginine methyltransferase 1	-	+
3. Components of the ubiquitination/proteosome pathway
HSPB1	Heat shock protein 27	+	+
UBAP2	Ubiquitin associated protein 2	-	-
UBAP2L	Ubiquitin associated protein 2-like	+	+
UBE2N	Ubiquitin-conjugating enzyme E2N	-	-
USP9X	Ubiquitin specific peptidase 9, X-linked	+	-
VCPIP	Valosin containing protein (p97)/p47 complex interacting protein 1	-	-
4. Splicing and RNA metabolism
HNRNPA1	hnRNP A1	+	+
HNRNPA3	hnRNP A3	-	-
HNRNPAB	hnRNP A/B	+	+
HNRNPA2B1	hnRNP A2/B1	+	+
HNRNPD	hnRNP D	+	+
HNRNPH	hnRNP H	-	+
HNRNPH2	hnRNP H2	-	-
HNRNPH3	hnRNP H3 (2H9)	-	-
HNRNPI	hnRNP I	+	+
HNRNPK	hnRNP K	+	+
HNRNPL	hnRNP L	+	+
HNRNPM	hnRNP M	+	+
HNRNPU	hnRNP U	+	+
PCBP1	Poly(rC) binding protein 1	-	+
PCBP2	Poly(rC) binding protein 2	-	-
STAU1	Staufen, RNA binding protein, homolog 1	-	+
ELAVL1	ELAV (embryonic lethal, abnormal vision, Drosophila)-like 1 (Hu antigen R)	-	-
PUM1	Pumilio homolog 1	-	-
IGF2BP2	Insulin-like growth factor 2 mRNA binding protein 2	-	-
FUS	Fusion (involved in t(12;16) in malignant liposarcoma	+	+
WTAP	Wilms tumor 1 associated protein	-	-
SRP9	Signal recognition particle 9kDa	-	+
SNRPB	Small nuclear ribonucleoprotein polypeptides B and B1	+	+
SF1	Splicing factor 1	+	+
SFRS1	Splicing factor, arginine/serine-rich 1	-	-
SFRS3	Splicing factor, arginine/serine-rich 3	+	+
KHSRP	KH-type splicing regulatory protein	+	+
QKI	Quaking homolog, KH domain RNA binding	-	-
SF3A1	Splicing factor 3a, subunit 1	-	-
SF3B2	Splicing factor 3B, subunit 2	+	+
SF3B3	Splicing factor 3B, subunit 3	+	+
POLDIP3	Polymerase (DNA-directed), delta interacting protein 3	-	-
RNPS1	RNA binding protein S1, serine-rich domain	+	-
RPS3	40S ribosomal protein S3	-	-
RPS3A	40S ribosomal protein 3a	+	+
RPS4X	40S ribosomal protein S4, X-linked	-	-
RPS5	40S ribosomal protein S5	+	+
RPS6	40S ribosomal protein S6	-	+
RPS7	40S ribosomal protein S7	+	+
RPS8	40S ribosomal protein S8	+	+
RPS10	40S ribosomal protein S10	+	+
RPS12	40S ribosomal protein S12	-	+
RPS14	40S ribosomal protein S14	-	-
RPS15	40S ribosomal protein S15	+	+
RPS15A	40S ribosomal protein S15a	-	-
RPS16	40S ribosomal protein S16	-	-
RPS17	40S ribosomal protein S17	-	-
RPS18	40S ribosomal protein S18	-	-
RPS19	40S ribosomal protein S19	+	+
RPS20	40S ribosomal protein S20	-	+
RPS25	40S ribosomal protein S25	-	+
RPS27	40S ribosomal protein S27	-	-
RPS28	40S ribosomal protein S28	+	+
RPS29	40S ribosomal protein S29	+	+
RPL3	60S ribosomal protein L3	-	+
RPL4	60S ribosomal protein L4	-	-
RPL5	60S ribosomal protein L5	-	-
RPL7A	60S ribosomal protein L7a	+	+
RPL8	60S ribosomal protein L8	+	+
RPL10	60S ribosomal protein L10	+	-
RPL11	60S ribosomal protein L11	+	-
RPL12	60S ribosomal protein L12	+	+
RPL13	60S ribosomal protein L13	-	-
RPL14	60S ribosomal protein L14	-	-
RPL17	60S ribosomal protein L17	+	+
RPL18	60S ribosomal protein L18	+	+
RPL18A	60S ribosomal protein L18a	-	-
RPL19	60S ribosomal protein L19	-	-
RPL21	60S ribosomal protein L21	+	+
RPL22	60S ribosomal protein L22	+	+
RPL23	60S ribosomal protein L23	-	-
RPL23A	60S ribosomal protein L23a	-	+
RPL26	60S ribosomal protein L26	+	+
RPL27	60S ribosomal protein L27	+	+
RPL27A	60S ribosomal protein L27a	-	+
RPL28	60S ribosomal protein L28	-	-
RPL32	60S ribosomal protein L32	-	-
RPL34	60S ribosomal protein L34	-	+
RPL36	60S ribosomal protein L36	-	+
RPLP0	60S ribosomal protein P0	+	+
RPLP2	60S ribosomal protein P2	+	+
PRPF3	PRP3 pre-mRNA processing factor 3 homolog	-	-
PRPF40A	PRP40 pre-mRNA processing factor 40 homolog A	-	+
PRPF6	PRP6 pre-mRNA processing factor 6 homolog	-	-
SNRPA1	Small nuclear ribonucleoprotein polypeptide A'	-	-
SNRPC	Small nuclear ribonucleoprotein polypeptide C	-	-
SNRPD1	Small nuclear ribonucleoprotein D1	+	+
SNRPD3	Small nuclear ribonucleoprotein D3 polypeptide	+	+
SNRPF	Small nuclear ribonucleoprotein polypeptide F	-	-
SNRP70	Small nuclear ribonucleoprotein 70kDa polypeptide	+	+
SNRP200	Small nuclear ribonucleoprotein 200kDa polypeptide	-	+
CSTF2	Cleavage stimulation factor, 3' pre-RNA, subunit 2	-	+
LSM3	LSM3 homolog, U6 small nuclear RNA associated	-	-
SRRM2	Serine/arginine repetitive matrix 2	-	+
FXR1	Fragile X mental retardation, autosomal homolog 1	-	+
NUFIP2	Nuclear fragile X mental retardation protein interacting protein 2	-	-
SERBP1	SERPINE1 mRNA binding protein 1	+	+
ATXN2	Ataxin 2	-	-
DDX1	DEAD (Asp-Glu-Ala-Asp) box polypeptide 1	+	+
DDX6	DEAD (Asp-Glu-Ala-Asp) box polypeptide 6	-	-
DDX17	DEAD (Asp-Glu-Ala-Asp) box polypeptide 17	-	-
DDX19B	DEAD (Asp-Glu-Ala-Asp) box polypeptide 19	-	-
DHX38	DEAH (Asp-Glu-Ala-His) box polypeptide 38	+	-
DDX42	DEAD (Asp-Glu-Ala-Asp) box polypeptide 42	-	-
DHX15	DEAH (Asp-Glu-Ala-His) box polypeptide 15	-	-
CPSF6	Cleavage and polyadenylation specific factor 6	-	+
CPSF7	Cleavage and polyadenylation specific factor 7	-	-
FIP1L1	FIP1 like 1	-	-
EIF2A	Eukaryotic translation initiation factor 2A	+	+
EIF3A	Eukaryotic translation initiation factor 3, subunit A	+	-
EIF3C	Eukaryotic translation initiation factor 3, subunit C	-	-
EIF4G1	Eukaryotic translation initiation factor 4 gamma, 1	+	+
EIF4G2	Eukaryotic translation initiation factor 4 gamma, 2	-	-
EEF1A1	Eukaryotic translation elongation factor 1 alpha 1	+	+
EEF1D	Eukaryotic translation elongation factor 1 delta	+	+
EEF1E1	Eukaryotic translation elongation factor 1 epsilon 1	+	+
WIBG	Within bgcn homolog	-	-
RNMT	RNA (guanine-7-) methyltransferase	-	-
EDC4	Enhancer of mRNA decapping 4	-	-
PABPC1	Poly(A) binding protein, cytoplasmic 1	-	-
PABPC1L	Poly(A) binding protein, cytoplasmic 1-like	+	+
PABPC4	Poly(A) binding protein, cytoplasmic 4	+	+
LARP1	La ribonucleoprotein domain family, member 1	+	-
LARP7	La ribonucleoprotein domain family, member 7	-	-
CD2BP2	CD2 (cytoplasmic tail) binding protein 2	-	-
XRN2	5'-3' exoribonuclease 2	+	-
ABCF1	ATP-binding cassette, sub-family F (GCN20), member 1	+	-
ROD1	ROD1 regulator of differentiation 1	-	-
CSDE1	Cold shock domain containing E1, RNA-binding	-	-
SMU1	Smu-1 suppressor of mec-8 and unc-52 homolog	-	-
PATL1	Protein associated with topoisomerase II homolog 1	-	-
5. DNA repair
KU70	ATP-dependent DNA helicase II, 70 kDa subunit	+	+
KU80	X-ray repair complementing defective repair in Chinese hamster cells 5	+	+
6. Chaperones and cochaperones
BAG3	BCL2-associated athanogene 3	+	+
CCT2	Cchaperonin containing TCP1, subunit 2	+	+
TRAP1	TNF receptor-associated protein 1	-	+
DNAJ	DnaJ	+	+
HSPA2	Heat shock 70kDa protein 2	-	-
HSPA5	Heat shock 70kDa protein 5 (glucose-regulated protein, 78kDa)	-	+
HSPA6	Heat shock 70kDa protein 6 (HSP70B')	-	-
HSPA7	Heat shock 70kDa protein 7 (HSP70B)	-	-
HSPA8	Heat shock 70kDa protein 8	+	-
HSPA9	Heat shock 70kDa protein 9 (mortalin)	-	-
HSC71	Heat shock cognate protein, 71kD	+	+
HSP90	Heat shock protein 90kD	+	+
STIP1	Stress-induced-phosphoprotein 1	-	-
7. Cytoskeletal proteins
FMN2	Formin 2	-	-
OBSCN	Obscurin, cytoskeletal calmodulin and titin-interacting RhoGEF	-	-
EML3	Echinoderm microtubule associated protein like 3	-	-
CCDC6	Coiled-coil domain containing 6	-	+
CEP170	Centrosomal protein 170kDa	-	-
ERC2	ELKS/RAB6-interacting/CAST family member 2	-	-
SYNE1	Spectrin repeat containing, nuclear envelope 1	-	-
MAP4	Microtubule-associated protein 4	+	+
VASP	Vasodilator-stimulated phosphoprotein	-	+
TRIP6	Thyroid hormone receptor interactor 6	-	+
ACTA1	Actin, alpha 1	+	+
DYNC1I2	Dynein, cytoplasmic 1, intermediate chain 2	-	-
SEP9	Septin 9	+	-
FLNC	Filamin C	+	+
TUB	Tubulin	+	+
SPTAN1	Spectrin, alpha, non-erythrocytic 1
TJP1	Tight-junction protein 1	+	+
TJP2	Tight junction protein 2	-	-
9. Proteins involved in signal transduction pathway
GIGYF2	Grb10 interacting GYF protein 2	-	-
GPR143	G protein-coupled receptor 143	-	-
BZRAP1	Benzodiazapine receptor (peripheral) associated protein 1	-	-
DOCK7	Dedicator of cytokinesis 7	-	-
CIT	Citron (rho-interacting, serine/threonine kinase 21)	-	-
CSRP1	Cysteine and glycine-rich protein 1	-	-
SORBS2	Sorbin and SH3 domain containing 2	-	-
PRKAR2A	Protein kinase, cAMP-dependent, regulatory, type II, alpha	-	-
PDAP1	PDGFA associated protein 1	-	-
GNL3L	Guanine nucleotide binding protein-like 3 (nucleolar)-like	-	-
LGR5	Leucine-rich repeat-containing G protein-coupled receptor 5	-	-
EPS8	Epidermal growth factor receptor pathway substrate 8	-	-
ERC1	ELKS/RAB6-interacting/CAST family member 1	-	-
YWHAQ	Tyrosine 3-monooxygenase/tryptophan 5-monooxygenase activation protein, theta polypeptide	-	+
NGEF	Neuronal guanine nucleotide exchange factor	-	-
ZYX	Zyxin	-	+
ANXA2	Annexin A2	-	+
G3BP1	Ras-GTPase-activating protein-binding protein 1	+	+
G3BP2	GTPase activating protein (SH3 domain) binding protein 2	-	-
MAP4K4	Mitogen-activated protein kinase kinase kinase kinase 4	-	-
DNM2	Dynamin 2	-	-
C17orf71	Chromosome 17 open reading frame 71	-	-
10. Cell cycle regulators
SEP2	Septin 2	+	+
SEP7	Septin 7	+	+
PDS5A	PDS5, regulator of cohesion maintenance, homolog A	-	-
PA2G4	Proliferation-associated 2G4	+	+
TPR	Nuclear pore complex-associated protein TPR	-	+
CAPRIN1	Cell cycle associated protein 1	+	+
12. Transcriptional regulation
PHF6	PHD finger protein 6	-	-
MATR3	Matrin 3	-	-
SAFB	Scaffold attachment factor B	-	+
SAFB2	Scaffold attachment factor B2	-	-
THRAP3	Thyroid hormone receptor associated protein 3	-	-
BCLAF1	BCL2-associated transcription factor 1	-	-
CNOT2	CCR4-NOT transcription complex, subunit 2	-	-
CNBP	CCHC-type zinc finger, nucleic acid binding protein	-	-
ZNF35	Zinc finger protein 35	-	-
NONO	Non-POU domain containing, octamer-binding	-	-
SNW1	SNW domain containing 1	-	-
CDK9	Cyclin-dependent kinase 9	-	-
FUBP1	Far upstream element (FUSE) binding protein 1	-	-
FUBP3	Far upstream element (FUSE) binding protein 3	-	+
RBM39	RNA binding motif protein 39	-	-
EWSR1	Ewing sarcoma breakpoint region 1	-	-
TLE3	Transducin-like enhancer of split 3 (E(sp1) homolog, Drosophila)	-	+
PSPC1	Paraspeckle component 1	-	+
YBX1	Y box binding protein 1	-	+
YAP1	Yes-associated protein 1	-	+
THOC4	THO complex 4	-	+
TAF15	TAF15 RNA polymerase II, TATA box binding protein (TBP)-associated factor	-	-
ILF3	Interleukin enhancer binding factor 3	+	-
DBC1	Deleted in breast cancer 1	+	+
RUVBL1	RuvB-like 1	+	-
TARDBP	TAR DNA binding protein	+	-
TRIM28	Tripartite motif-containing 28	-	+
13. Kinases and phosphatases
PKM2	Pyruvate kinase, muscle	+	+
PIP4K2C	Phosphatidylinositol-5-phosphate 4-kinase, type II, gamma	-	-
CSNK1D	Casein kinase 1, alpha 1-like	-	-
14. Protein transport
NUP88	Nucleoporin 88kDa	-	-
NUP98	Nucleoporin 98kDa	-	-
SNX20	Sorting nexin 20	-	-
ABCF2	ATP-binding cassette, sub-family F (GCN20), member 2	-	-
KIF1A	Kinesin family member 1A	-	-
KIF1B	Kinesin family member 1B	-	-
KIFC2	Kinesin family member C2	-	-
SEC23IP	SEC23 interacting protein	-	+
SEC31A	SEC31 homolog A	-	-
KPNA2	Karyopherin alpha 2 (RAG cohort 1, importin alpha 1)	-	+
15. Other diverse functions
CCDC99	Coiled-coil domain containing 99	-	-
CCDC8	Coiled-coil domain containing 8	-	-
ARS2	Periplasmic arylsulfatase	-	-
YTHDF2	YTH domain family, member 2	-	-
YTHDF3	YTH domain family, member 3	-	-
ATXN2L	Ataxin 2-like	-	-
FAM98A	Family with sequence similarity 98, member A	-	-
FAM98B	Family with sequence similarity 98, member B	-	-
SLC4A7	Solute carrier family 4, sodium bicarbonate cotransporter, member 7	-	-
RSRC2	Arginine/serine-rich coiled-coil 2	-	-
FHL1	Four and a half LIM domains 1	-	-
BAT2	HLA-B associated transcript 2	-	-
BAT2D1	BAT2 domain containing 1	-	-
BAT2L	HLA-B associated transcript 2-like	-	-
LUC7L2	LUC7-like 2	-	-
CCBL2	Cysteine conjugate-beta lyase 2	-	-
COMMD4	COMM domain containing 4	-	-
DDRGK1	DDRGK domain containing 1	-	-
OTUD4	OTU domain containing 4	-	-
CNOT10	CCR4-NOT transcription complex, subunit 10	-	-
CAD	Carbamoyl-phosphate synthetase 2, aspartate transcarbamylase, and dihydroorotase	-	-
DPP9	Dipeptidyl-peptidase 9	-	-
AMOTL2	Angiomotin like 2	-	-
HDLBP	High density lipoprotein binding protein	-	-
RAI14	Retinoic acid induced 14	-	-
CTSD	Cathepsin D
AHNAK	AHNAK nucleoprotein	-	+
FAM120A	Family with sequence similarity 120A	-	+
POTEF	Similar to protein expressed in prostate, ovary, testis, and placenta 2	+	+
NCL	Nucleolin	+	+
MTHFD1	Methylenetetrahydrofolate dehydrogenase (NADP+ dependent) 1	+	-
RFC2	Replication factor C (activator 1) 2	+	-
HSPC117	Hypothetical protein HSPC117	-	-

## Sheet: Table S7
Table S7. GO-term IDs.
A. RNA splicing
GO ID	Function
0006396	RNA processing
0016071	mRNA metabolism
0008380	RNA splicing
0006367	mRNA processing
0000398	nuclear mRNA splicing, via spliceosome
0000377	RNA splicing, via traesterification reactions
0000376	RNA splicing, via traesterification reactions with bulged adenosime as nucleophile
0005681	spliceosome
B. Translation
GO ID	Function
0043232	intracellular non-membrane-bounded organelle
0043228	non-membrane-bounded organelle
0005829	cytosol
0030529	ribonucleoprotein complex
0006412	translation
0006414	translation elongation
0005198	structural molecule activity
0005840	ribosome
0003735	structural constituent of ribosome
0022626	cytosolic ribosome
0044445	cytosolic part
0033279	ribosomal subunit
0015935	small ribosomal subunit
0022627	cytosolic small ribosomal subunit
0015934	large ribosomal subunit
0022625	cytosolic large ribosomal subunit
C. Chaperone
GO ID	Function
0005832	chaperone-containing T-complex
0044445	cytosolic part
0006457	protein folding
0051082	unfolded protein binding
0005829	cytosol
D. Transcription
GO ID	Function
0030528	transcription regulator activity
0006350	transcription
008134	transcription factor binding
0003712	transcription cofactor activity
0016563	transcription activator activity
0016564	transcription repressor activity
0003714	transcription corepressor activity
0003713	transcription coactivator activity
E. Proteasome/Ubiquitination
GO ID	Function
0022624	proteasome accessory complex
0005838	proteasome regulatory particle
0010605	negative regulation of macromolecule metabolic process
0044092	negative regulation of molecular function
0043086	negative regulation of catalytic activity
0051248	negative regulation of protein metabolic process
0032269	negative regulation of cellular protein metabolic process
0031400	negative regulation of protein modification process
0010498	proteasomal protein catabolic process
0034161	proteasomal ubiquitin-dependent protein catabolic process
0031397	nagative regulation of protein ubiquitination
0051444	negative regulation of ubiquitin-protein ligase activity
0051352	negative regulation of ligase activity
0031145	anaphase-promoting complex-dependent proteasomal unbiqutin-dependent protein catabolic process
0051436	negative regulation of ubiquitin-protein ligase activity during mitotic cell cycle
0000502	proteasome complex
0051443	positive regulation of ubiquitin-protein ligase activity
0006508	proteolysis
0030163	protein catabolic process
0044257	cellular protein catabolic process
0051603	proteolysis involved in cellular protein catabolic process
0044093	positive regulation of molecular function
0019941	modification-dependent protein catabolic process
0043632	modification-dependent macromolecule catabolic process
0043085	positive regulation of catalytic activity
0031399	regulation of protein modification process
0006511	ubiquitin-dependent protein catabolic process
0031401	positive regulation of protein modification process
0031396	regulation of protein ubiquitination
0031398	positive regulation of protein ubiquitination
0051340	regulation of ligase activity
0051438	regulation of ubiquitination-protein ligase activity
0051351	positive regulation of ligase activity
0051439	regulation of ubiquitin-protein ligase acitivity during mitotic cell cycle
0051437	positive regulation of ubiquitin-protein ligase activity during mitotic cell cycle
0009057	macromolecule catabolic process
0044265	cellular macromolecule catabolic process
0051247	positive regulation of protein metabolic process
0032270	positive regulation of cellular protein metabolic process
0010604	positive regulation of macromolecule metabolic process
0032268	regulation of cellular protein metabolic process
0000278	mitotic cell cycle
0022402	cell cycle process
0007049	cell cycle
